# Supplementary material for: Hydrogen and halogen bonding in a concerted act of anion recognition: F− induced atmospheric CO2 uptake by an iodophenyl functionalized simple urea receptor
Source: Royal Society of Chemistry journal article supplement (doi:10.1039/c4dt00940a), 2014-01-01
Supplement: c4dt00940a1.pdf [file c4dt00940a1.pdf]

**Electronic Supplementary Information**

**Hydrogen and Halogen Bonding in a Concert Act of  
Anion Recognition: F<sup>-</sup> Induced Atmospheric CO<sub>2</sub>  
Uptake by an Iodophenyl Functionalized Simple  
Urea Receptor**

Romen Chutia and Gopal Das\*

Department of Chemistry, Indian Institute of Technology Guwahati, Guwahati.

Assam-781039, India

E-mail: [gdas@iitg.ernet.in](mailto:gdas@iitg.ernet.in)

## Contents.

|                                                                                                           |       |
|-----------------------------------------------------------------------------------------------------------|-------|
| 1. $^1\text{H}$ , $^{13}\text{C}$ NMR and IR spectra of receptor $\text{L}_1$                             | 3-4   |
| 2. $^1\text{H}$ , $^{13}\text{C}$ NMR and IR spectra of receptor $\text{L}_2$                             | 5-6   |
| 3. $^1\text{H}$ and $^{13}\text{C}$ NMR spectra of complex <b>1a</b>                                      | 7     |
| 4. Partial $^{13}\text{C}$ NMR spectra comparison of complex <b>1a</b> with $\text{TEAHCO}_3$             | 8     |
| 5. PXRD pattern and IR-spectra of complex <b>1a</b>                                                       | 8-9   |
| 6. $^1\text{H}$ , $^{13}\text{C}$ NMR, PXRD pattern and IR-spectra of complex <b>1b</b>                   | 9-11  |
| 7. $^1\text{H}$ , $^{13}\text{C}$ NMR, PXRD pattern and IR-spectra of complex <b>2a</b>                   | 11-13 |
| 8. Probable Mechanism for $\text{SiF}_6^{2-}$ recognition                                                 | 13    |
| 9. $^1\text{H}$ , $^{13}\text{C}$ NMR, PXRD pattern and IR-spectra of complex <b>2b</b>                   | 14-15 |
| 10. Table for crystallographic parameters and refinement details                                          | 16    |
| 11. Table for details of hydrogen bonding contacts in the complexes<br><b>1a-b</b> and <b>2a-b</b>        | 17    |
| 12. $^1\text{H}$ NMR Stack Plot, Fit Plot and Job's Plot for receptor $\text{L}_1$ with $\text{TEAHCO}_3$ | 18-19 |
| 13. $^1\text{H}$ NMR Stack Plot, Fit Plot and Job's Plot for receptor $\text{L}_1$ with n-TBAOAc          | 20-21 |
| 14. $^1\text{H}$ NMR Stack Plot, Fit Plot and Job's Plot for receptor $\text{L}_1$ with n-TBAF            | 22-24 |
| 15. $^1\text{H}$ NMR Stack Plot for receptor $\text{L}_1$ with TEACl                                      | 24    |
| 16. $^1\text{H}$ NMR Stack Plot for receptor $\text{L}_1$ with n-TBABr                                    | 25    |
| 17. $^1\text{H}$ NMR Stack Plot for receptor $\text{L}_1$ with n-TBAI                                     | 25    |
| 18. $^1\text{H}$ NMR Stack Plot for receptor $\text{L}_1$ with n-TBAHSO <sub>4</sub>                      | 25    |
| 19. $^1\text{H}$ NMR Stack Plot for receptor $\text{L}_1$ with n-TBAH <sub>2</sub> PO <sub>4</sub>        | 26    |
| 20. $^1\text{H}$ NMR Stack Plot for receptor $\text{L}_1$ with TEANO <sub>3</sub>                         | 26    |
| 21. $^1\text{H}$ NMR Stack Plot, Fit Plot and Job's Plot for receptor $\text{L}_2$ with n-TBAOAc          | 27-28 |
| 22. $^1\text{H}$ NMR Stack Plot, Fit Plot and Job's Plot for receptor $\text{L}_2$ with $\text{TEAHCO}_3$ | 29-31 |
| 23. $^1\text{H}$ NMR Stack Plot, Fit Plot and Job's Plot for receptor $\text{L}_2$ with n-TBAF            | 32-34 |
| 24. UV/Vis spectrum of $\text{L}_1$ and $\text{L}_2$ in MeCN upon addition different anions               | 35-36 |

### Characterization of receptor $L_1$ :

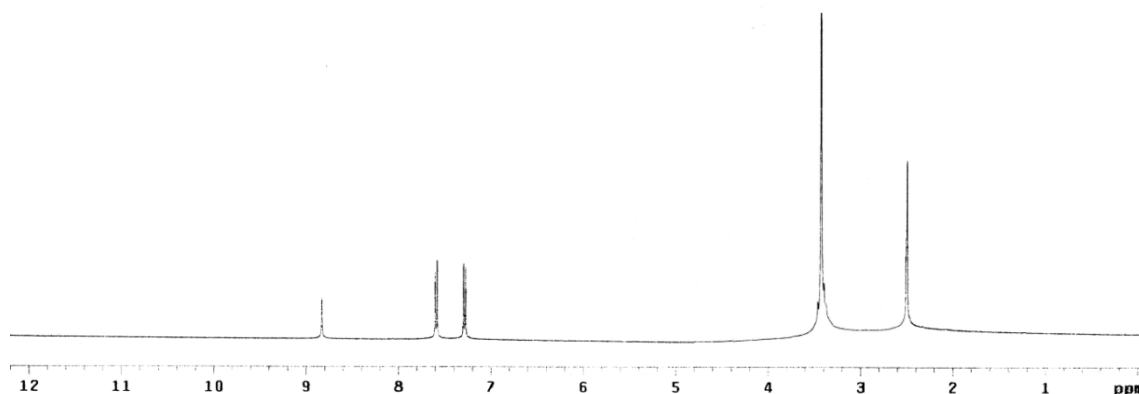

**Figure S1:**  $^1\text{H}$  NMR spectrum of receptor  $L_1$  in  $\text{DMSO-}d_6$  (Varian-400 MHz) at 298 K.  $\delta$  (ppm), 7.28 (d, 4H, ArH), 7.59 (d, 4H, ArH), 8.832 (s, 2H, -NH).

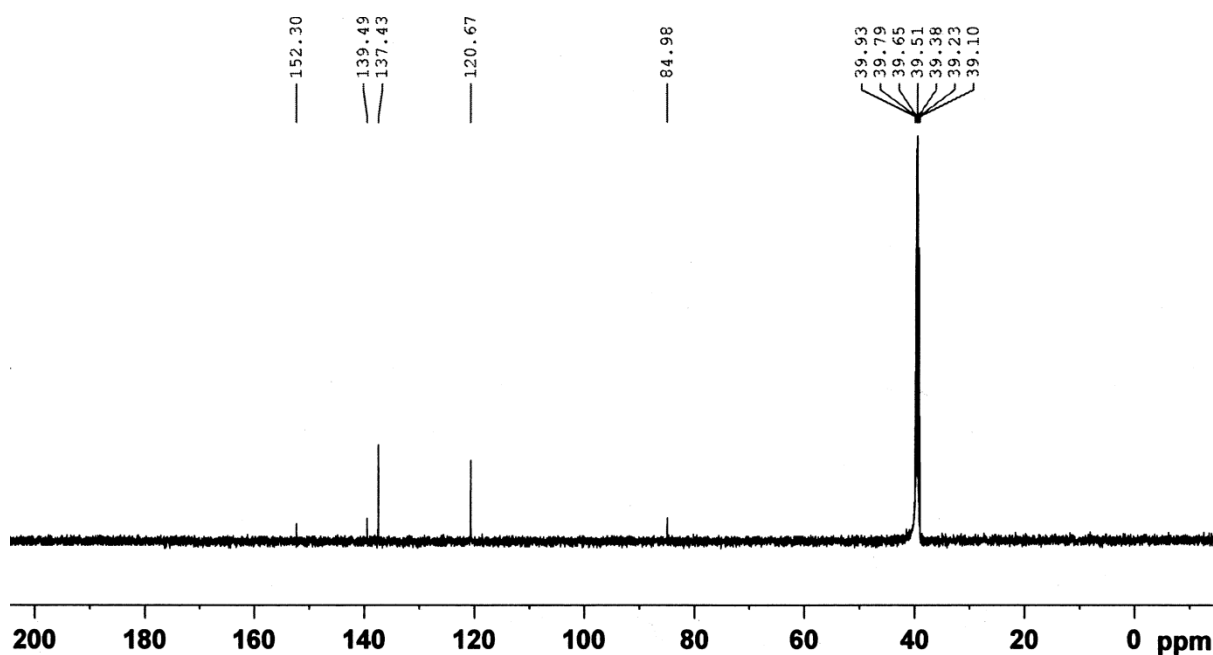

**Figure S2:**  $^{13}\text{C}$  NMR spectrum of receptor  $L_1$  in  $\text{DMSO-}d_6$  (Bruker-150 MHz) at 298 K.  $\delta$  (ppm), 84.98 (2C, ArH), 120.67 (4C, ArH), 137.43 (4C, ArH), 139.49 (2C, ArH), 152.30 (1C, C=O).

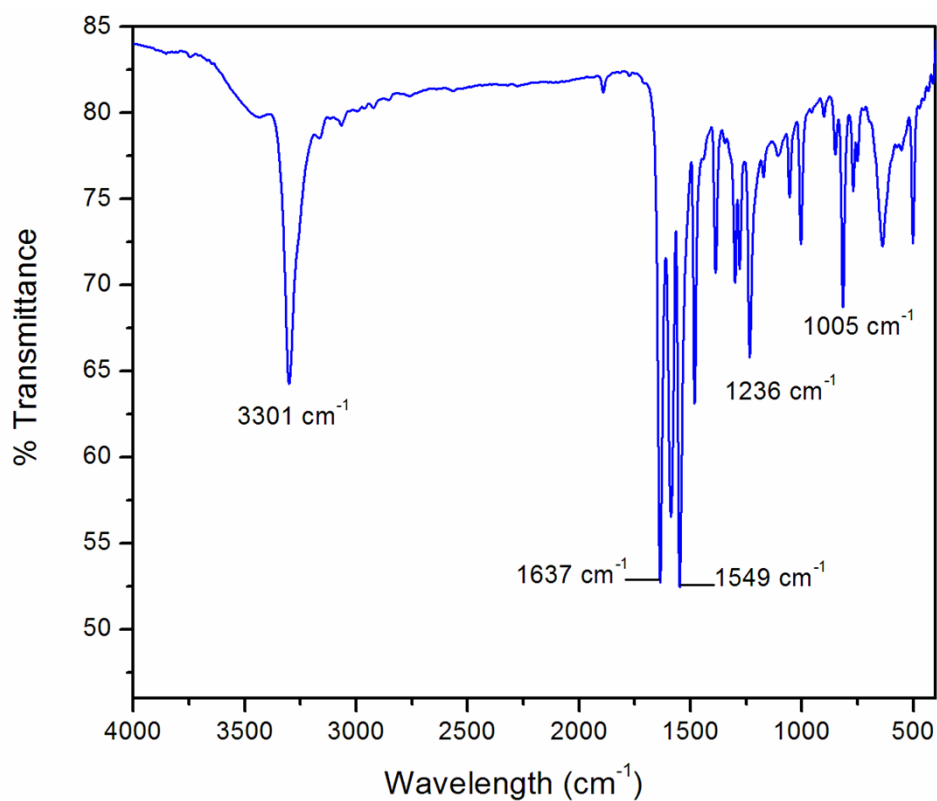

**Figure S3.** FT-IR spectrum of receptor  $L_1$  recorded in KBr pellet.  $\nu$   $\text{cm}^{-1}$ : 1005 (C-I), 1236 (C-N), 1549 (C=C), 1637 (-C=O), 3301 (N-H).

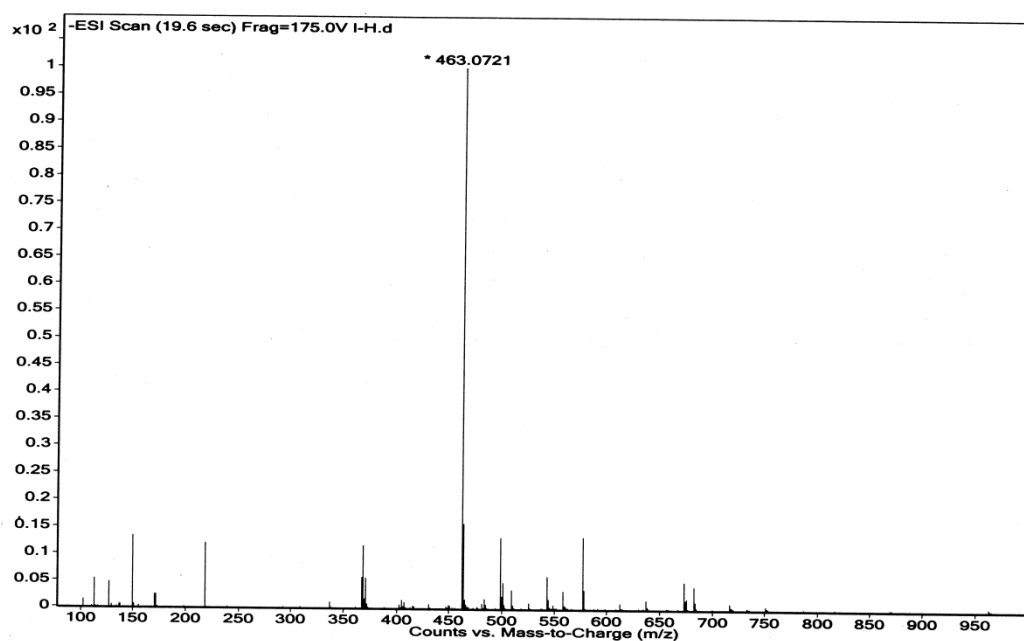

**Figure S4.** ESI-Mass spectrum of  $L_1$  recorded in acetonitrile (MeCN) at 298 K showing  $m/z = 463.07$  corresponds to  $[M]^+$ .

### Characterization of receptor $L_2$ :

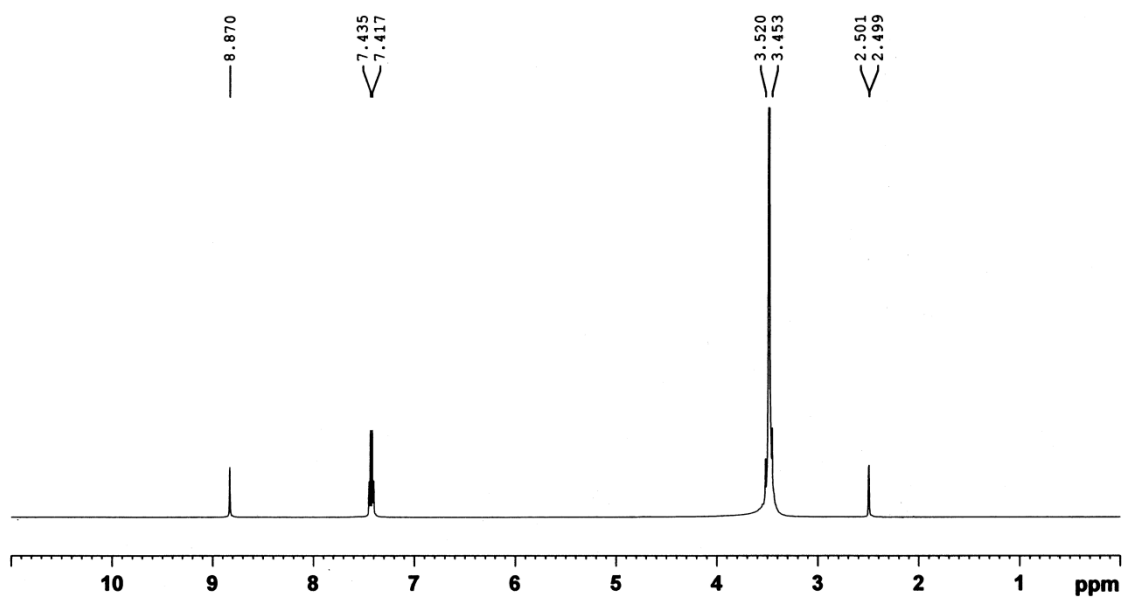

**Figure S5:**  $^1\text{H}$  NMR spectrum of receptor  $L_2$  in  $\text{DMSO-}d_6$  (Bruker-600 MHz) at 298 K,  $\delta$  (ppm), 7.417 (d, 4H, ArH), 7.435 (d, 4H, ArH), 8.870 (s, 2H, -NH).

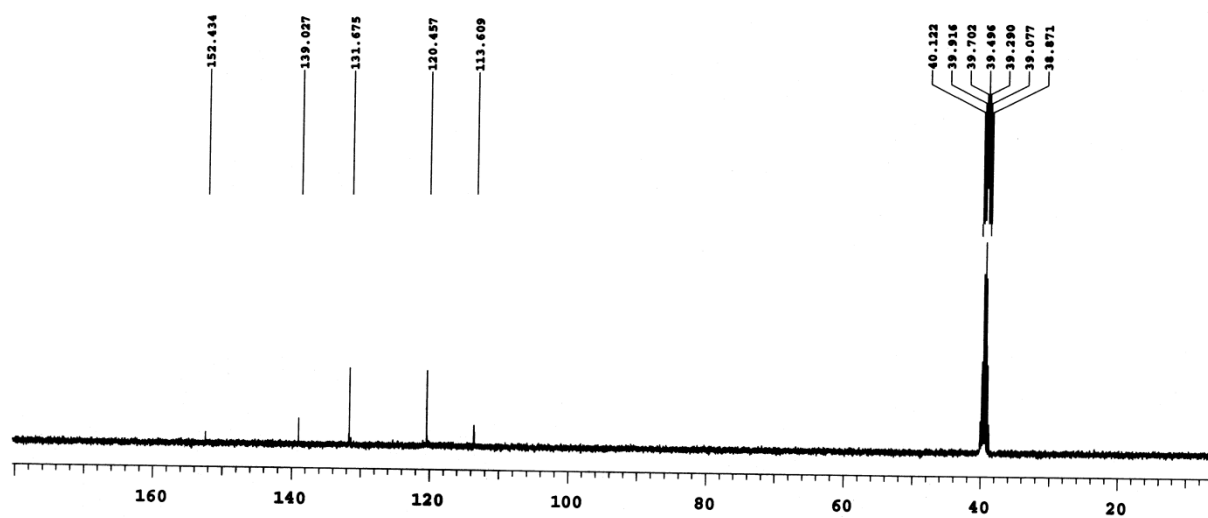

**Figure S6:**  $^{13}\text{C}$  NMR spectrum of receptor  $L_2$  in  $\text{DMSO-}d_6$  (Bruker-150 MHz) at 298 K.  $\delta$  (ppm), 113.609 (2C, ArH), 120.457 (4C, ArH), 131.675 (4C, ArH), 139.027 (2C, ArH), 152.434 (1C, C=O).

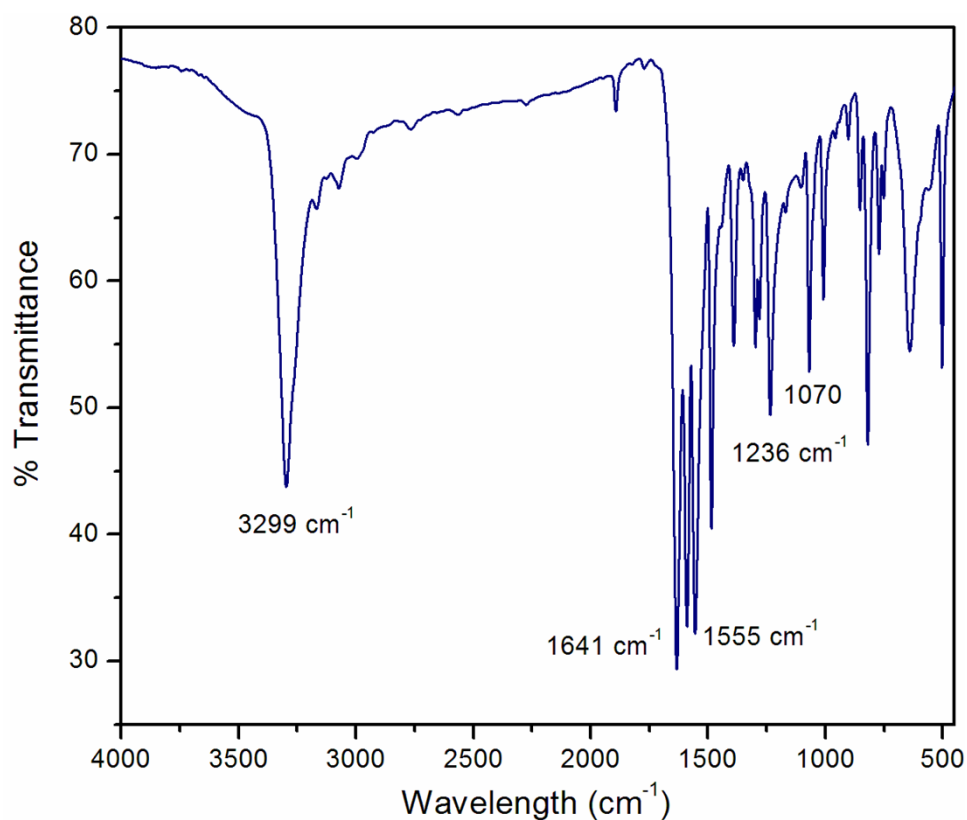

**Figure S7.** FT-IR spectrum of receptor  $L_2$  recorded in KBr pellet.  $\nu$   $\text{cm}^{-1}$ : 1070 (C-Br), 1236 (C-N), 1555 (C=C), 1641 (-C=O), 3299 (N-H).

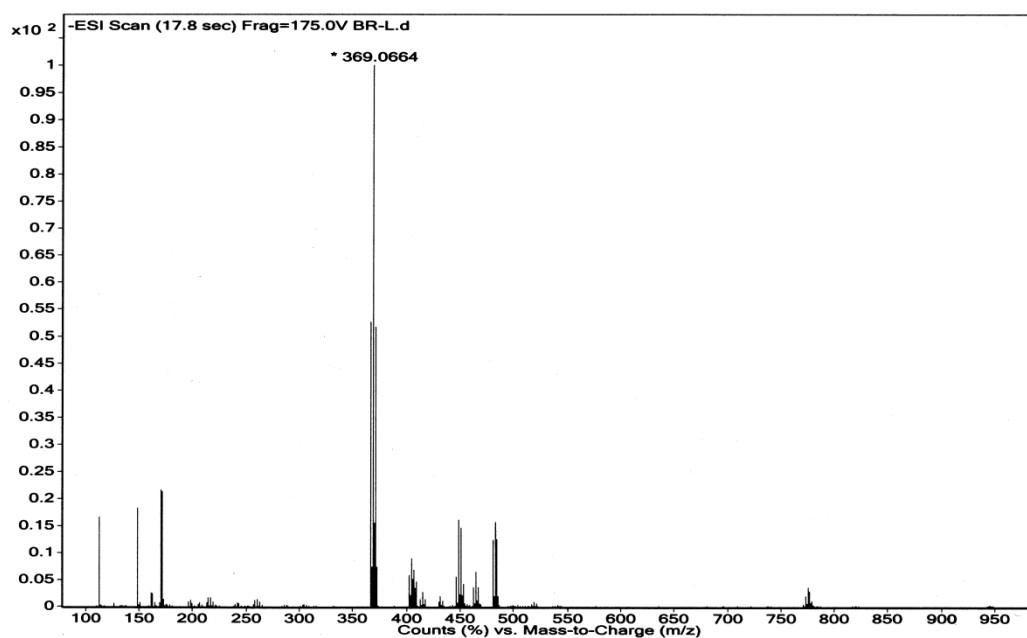

**Figure S8.** ESI-Mass spectrum of  $L_2$  recorded in acetonitrile (MeCN) at 298 K showing  $m/z = 369.06$  corresponds to  $[M]^+$ .

### Characterization of complex 1a:

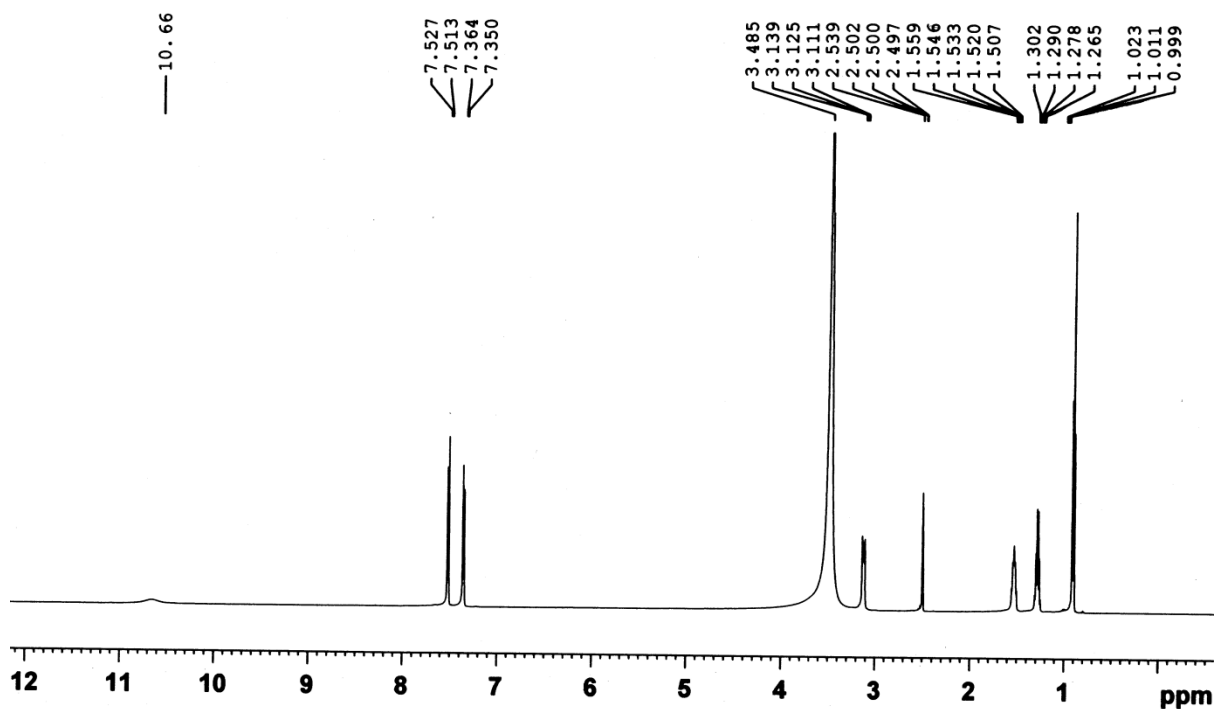

**Figure S9:**  $^1\text{H}$  NMR spectrum of complex **1a** in  $\text{DMSO-}d_6$  (Bruker-600 MHz) at 298 K,  $\delta(\text{ppm})$ , 1.011 (t, 12H, n-TBA- $\text{CH}_3$ ), 1.28 (q, 8H, n-TBA- $\text{CH}_2$ ), 1.533 (q, 8H, n-TBA- $\text{CH}_2$ ), 3.125 (t, 8H, n-TBA- $\text{N}^+\text{CH}_2$ ), 7.57 (d, 4H, ArH), 7.520 (d, 4H, ArH), 10.67 (s, 2H, -NH).

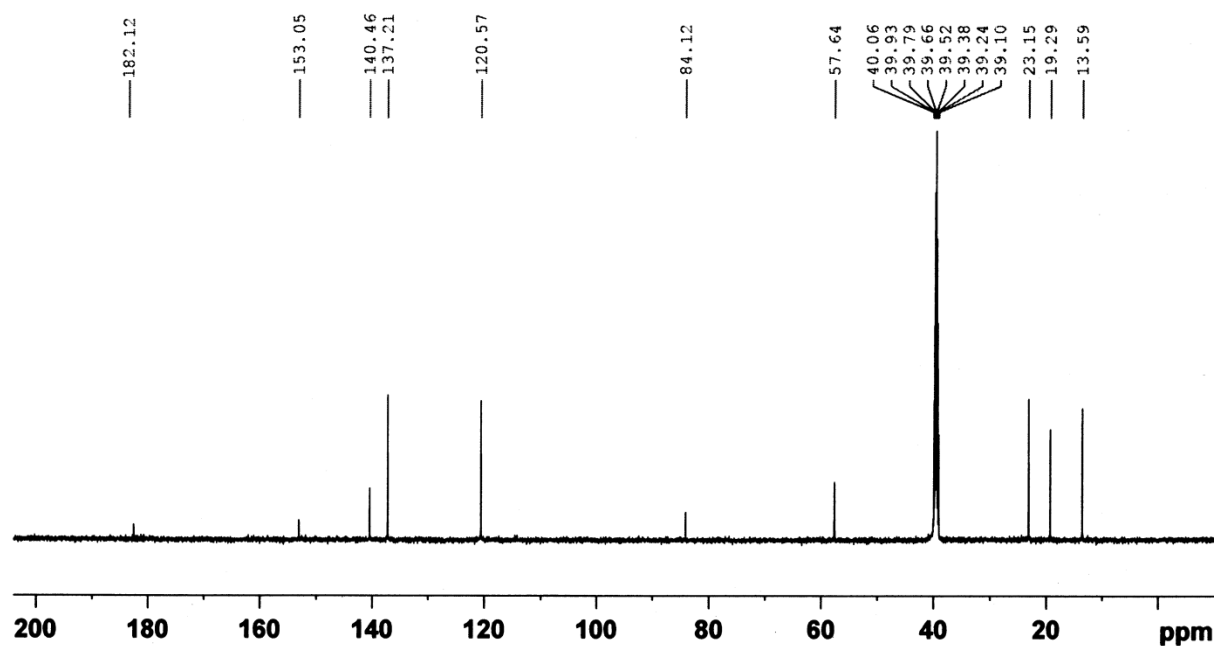

**Figure S10:**  $^{13}\text{C}$  NMR spectrum of complex **1a** in  $\text{DMSO-}d_6$  (Bruker-150 MHz) at 298 K.  $\delta(\text{ppm})$ , 13.59 (4C, n-TBA- $\text{CH}_3$ ), 19.29 (4C, n-TBA- $\text{CH}_2$ ), 23.15 (4C, n-TBA- $\text{CH}_2$ ), 57.64

(4C, n-TBA-N<sup>+</sup>CH<sub>2</sub>), 84.12 (2C, ArH), 120.15 (4C, ArH), 137.21 (4C, ArH), 140.46 (2C, ArH), 153.05 (1C, C=O), and 182.12 (1C, HCO<sub>3</sub><sup>-</sup> anion).

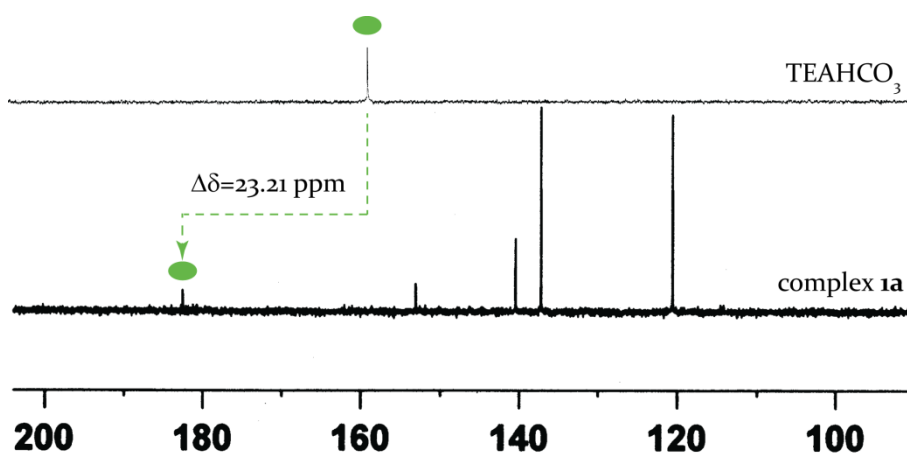

**Figure S11.** Partial <sup>13</sup>C NMR spectrum of complex **1a** (below) showing the huge downfield shift of the HCO<sub>3</sub><sup>-</sup> resonance relative to the (TEA)HCO<sub>3</sub> salt (above).

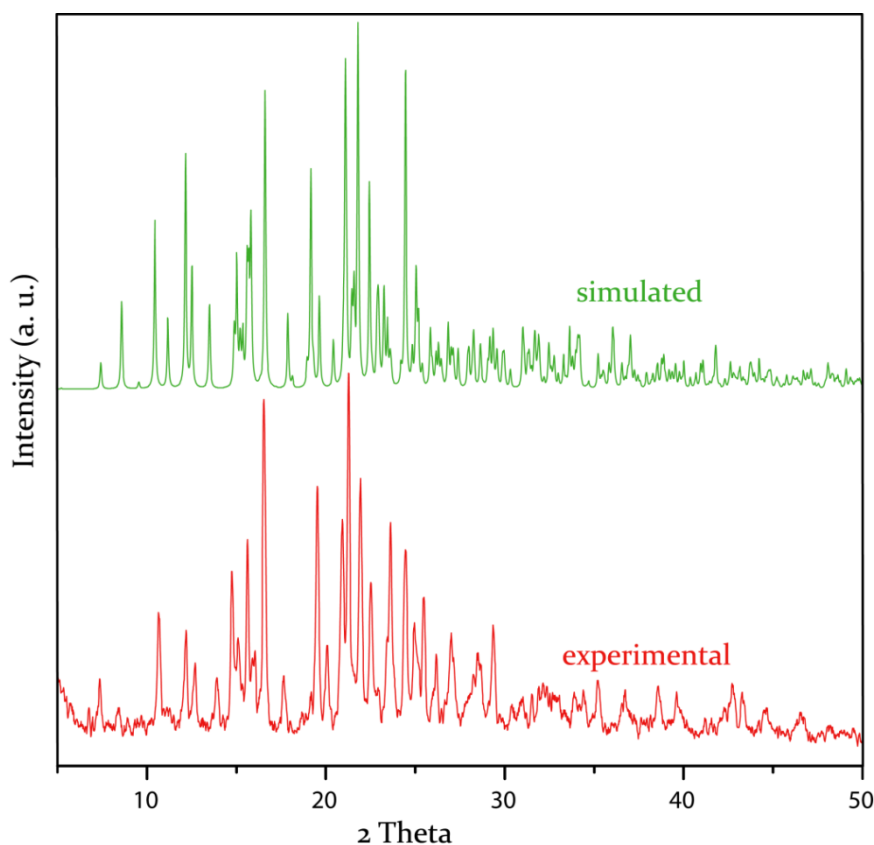

**Figure S12.** Powder X-ray diffraction patterns of isolated crystals of **1a**: experimental is in green colour and simulated pattern is in red colour.



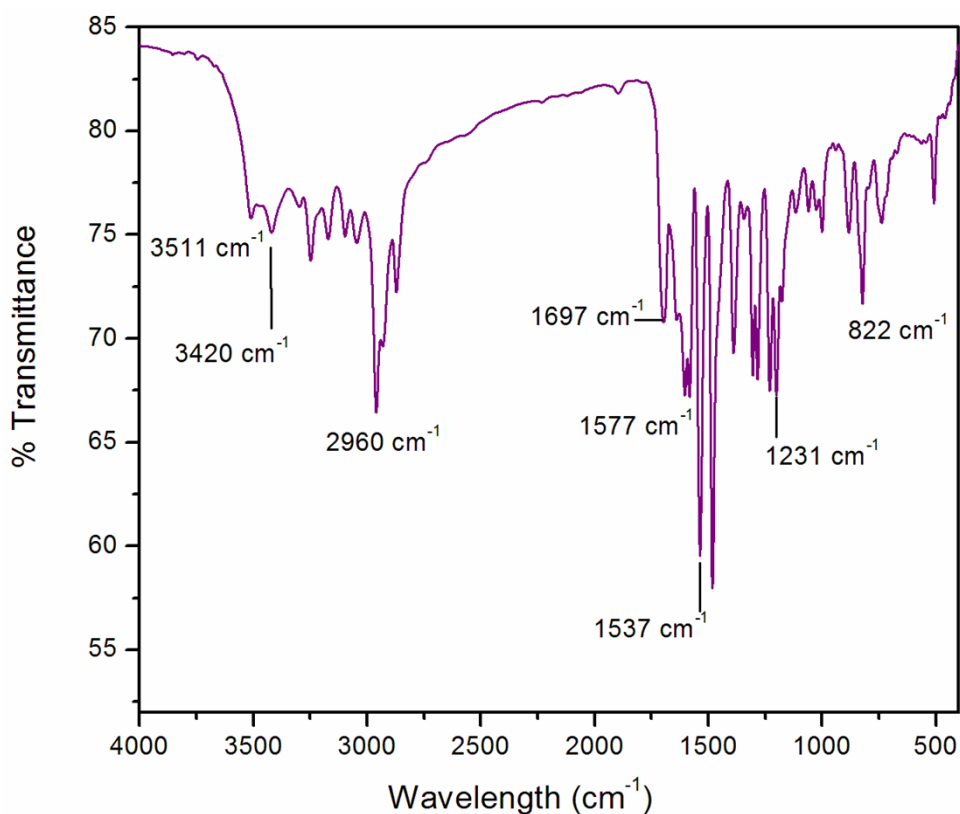

**Figure S13.** FT-IR spectrum of complex **1a** recorded in KBr pellet.  $\nu$  cm<sup>-1</sup>: 822 (HCO<sub>3</sub><sup>-</sup>), 1231 (C-N), 1537 (C=C), 1577(C-O), 1697 (-C=O), 2960 (C-H), 3420 (N-H), 3511(O-H).

**Characterization of complex 1b:**

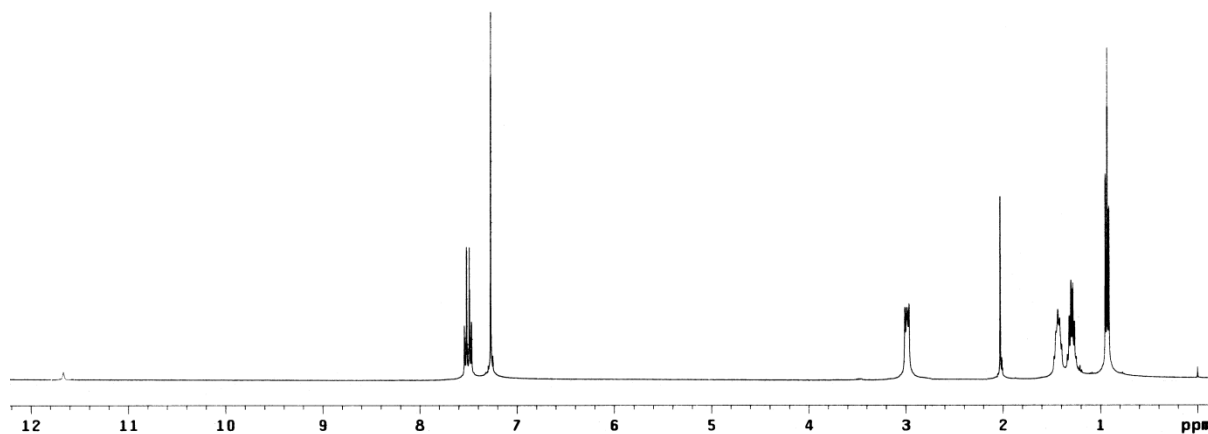

**Figure S14:** <sup>1</sup>H NMR spectrum of complex **1b** in CDCl<sub>3</sub> (Varian-400 MHz) at 298 K,  $\delta$  (ppm), 0.93 (t, 12H, n-TBA-CH<sub>3</sub>), 1.294 (q, 8H, n-TBA-CH<sub>2</sub>), 1.43 (t, 8H, n-TBA-CH<sub>2</sub>), 2.029 (s, Acetate-CH<sub>3</sub>), 2.987 (t, 8H, n-TBA-N<sup>+</sup>CH<sub>2</sub>), 7.485 (d, 4H, ArH), 7.53 (d, 4H, ArH), 11.67 (s, 2H, -NH).

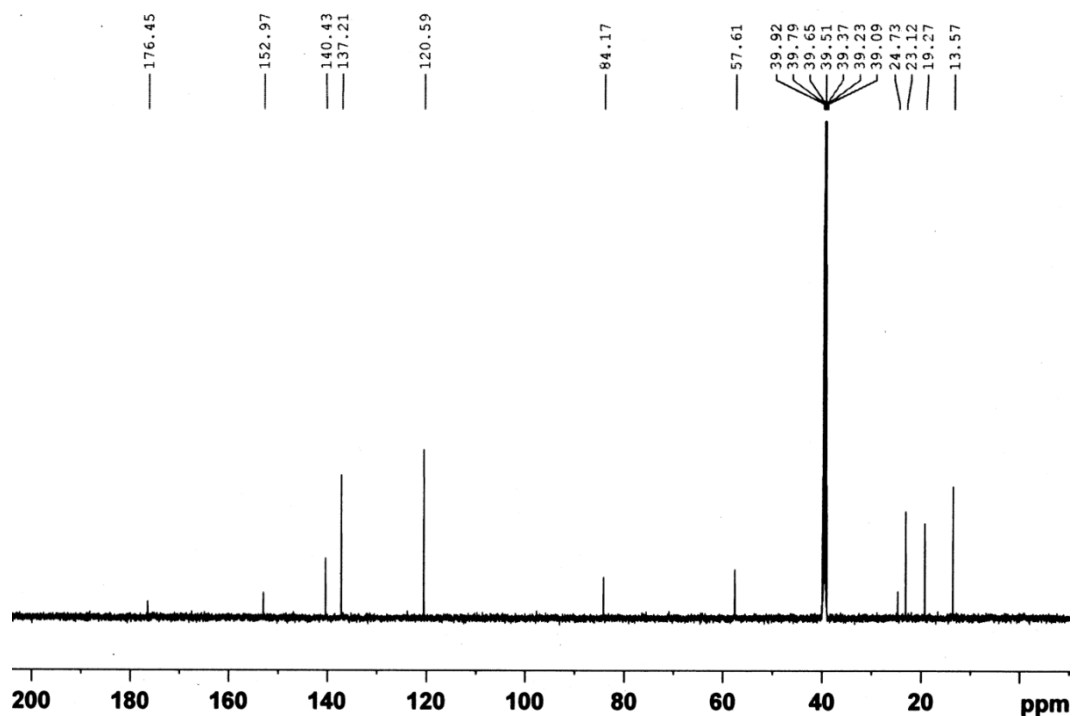

**Figure S15:**  $^{13}\text{C}$  NMR spectrum of complex **1b** in  $\text{DMSO-}d_6$  (Bruker-150 MHz) at 298 K, 13.57 (4C, n-TBA- $\text{CH}_3$ ), 19.27 (4C, n-TBA- $\text{CH}_2$ ), 23.12 (4C, n-TBA- $\text{CH}_2$ ), 24.73 (1C, Acetate- $\text{CH}_3$ ), 57.61 (4C, n-TBA- $\text{N}^+\text{CH}_2$ ), 84.17 (2C, ArH), 120.59 (4C, ArH), 137.21 (4C, ArH), 140.43 (2C, ArH), 152.97 (1C, C=O) and 176.53 (Acetate- $\text{COO}^-$ ).

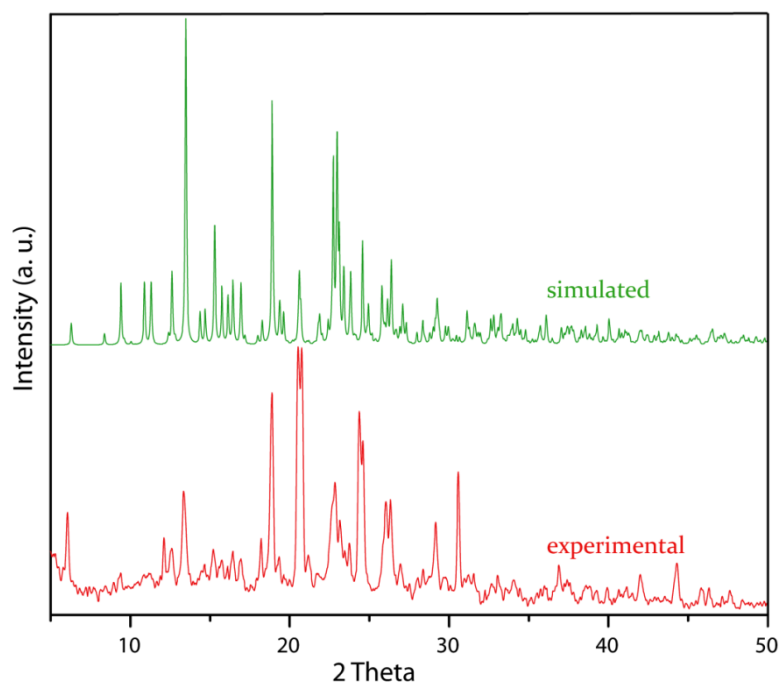

**Figure S16.** Powder X-ray diffraction patterns of isolated crystals of **1b**: experimental is in green colour and simulated pattern is in red colour.

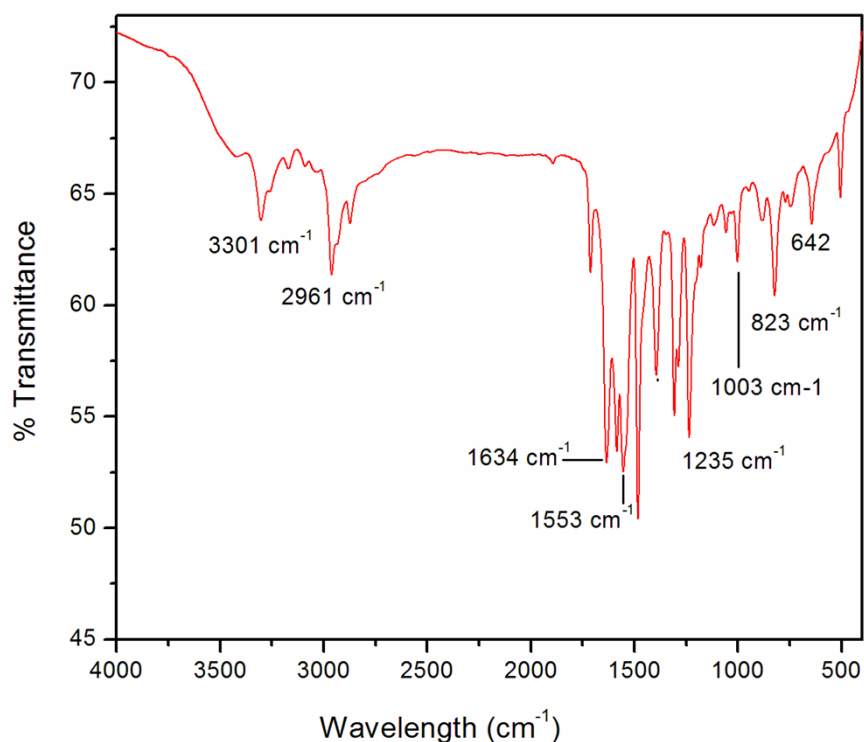

**Figure S17.** FT-IR spectrum of complex **1b** recorded in KBr pellet.  $\nu$   $\text{cm}^{-1}$ : 642(-COO deformation), 823 (-COO), 1003(C-I), 1235 (C-N), 1553 (C=C), 1634 (-C=O), 2961 (C-H), 3301 (N-H).

**Characterization of complex 2a:**

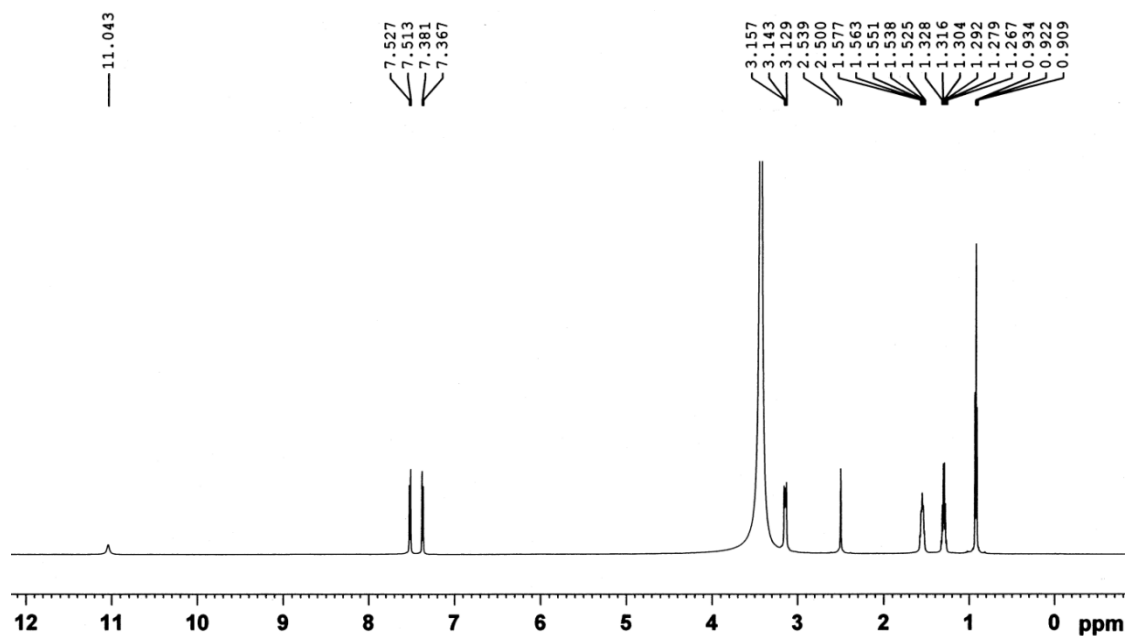

**Figure S18:**  $^1\text{H}$  NMR spectrum of complex **2a** in  $\text{DMSO-}d_6$  (Bruker-600 MHz) at 298 K,  $\delta$  (ppm), 0.922 (t, 12H, n-TBA- $\text{CH}_3$ ), 1.30 (s, 8H, n-TBA- $\text{CH}_2$ ), 1.55 (p, 8H, n-TBA- $\text{CH}_2$ ), 3.143 (s, 8H, n-TBA- $\text{N}^+\text{CH}_2$ ), 7.374 (d, 4H, ArH), 7.52 (d, 4H, ArH), 11.043 (s, 2H, -NH).

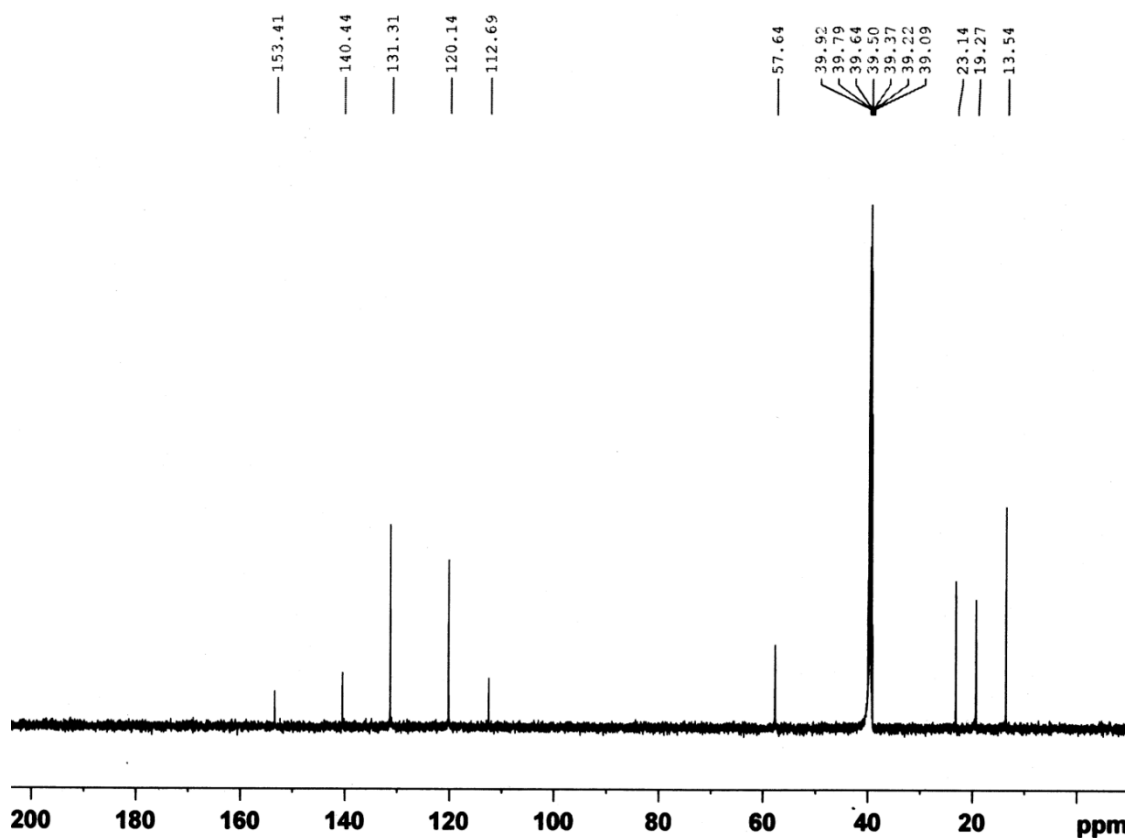

**Figure S19:**  $^{13}\text{C}$  NMR spectrum of complex **2a** in  $\text{DMSO-}d_6$  (Bruker-150 MHz) at 298 K.  $\delta$  (ppm) 13.54 (4C, n-TBA- $\text{CH}_3$ ), 19.27 (4C, n-TBA- $\text{CH}_2$ ), 23.14 (4C, n-TBA- $\text{CH}_2$ ), 57.64 (4C, n-TBA- $\text{N}^+\text{CH}_2$ ), 112.69 (2C, ArH), 120.14 (4C, ArH), 131.31 (4C, ArH), 140.44 (2C, ArH) and 153.41 (1C, C=O).

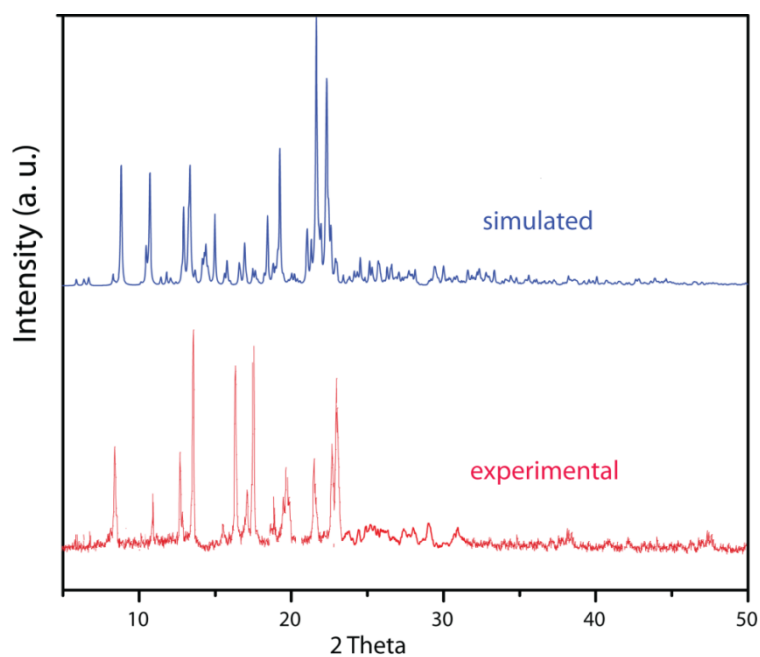

**Figure S20.** Powder X-ray diffraction patterns of isolated crystals of **2a**: experimental is in blue colour and simulated pattern is in red colour.

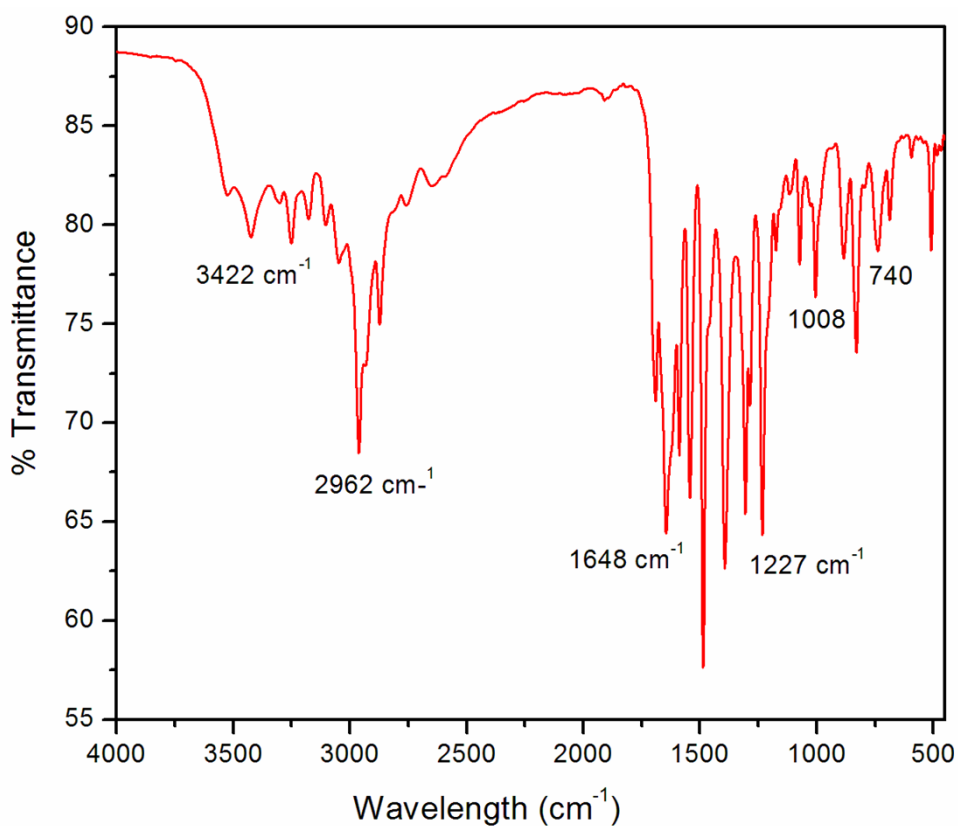

**Figure S21.** FT-IR spectrum of complex **2a** recorded in KBr pellet.  $\nu$  cm<sup>-1</sup>: 740(SiF<sub>6</sub><sup>2-</sup>), 1008(C-Br), 1227 (C-N), 1648 (-C=O), 2962 (C-H), 3422 (N-H).

**Characterization of complex 2b:**

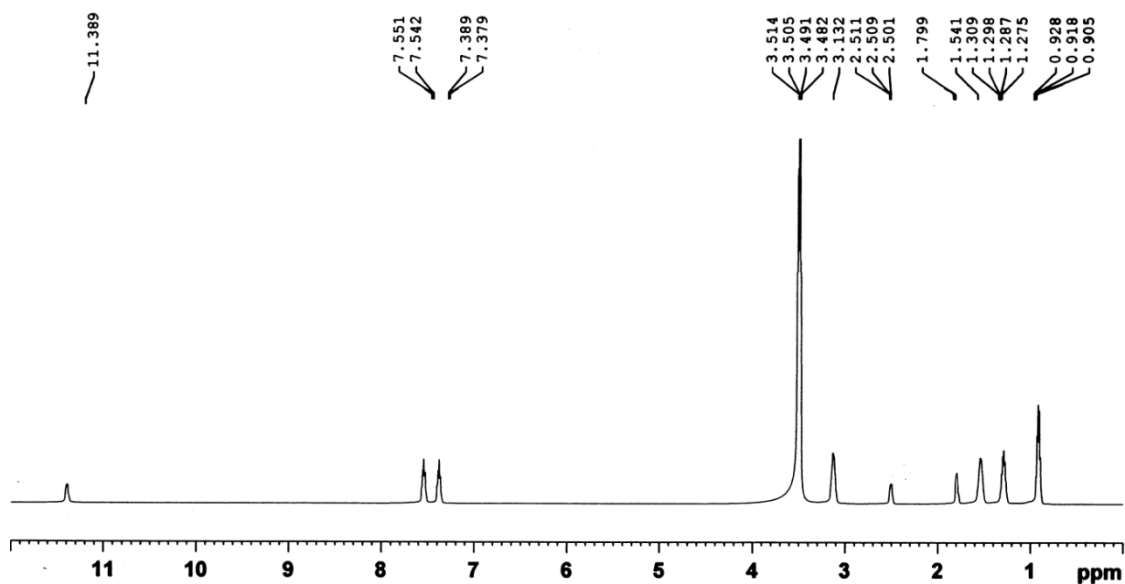

**Figure S22:** <sup>1</sup>H NMR spectrum of complex **2b** in DMSO-*d*<sub>6</sub> (Bruker-600 MHz) at 298 K,  $\delta$  (ppm), 0.91 (t, 12H, n-TBA-CH<sub>3</sub>), 1.293 (q, 8H, n-TBA-CH<sub>2</sub>), 1.541 (s, 8H, n-TBA-CH<sub>2</sub>), 1.799 (s, Acetate-CH<sub>3</sub>), 3.132 (s, 8H, n-TBA-N<sup>+</sup>CH<sub>2</sub>), 7.384 (d, 4H, ArH), 7.547 (d, 4H, ArH), 11.39 (s, 2H, -NH).

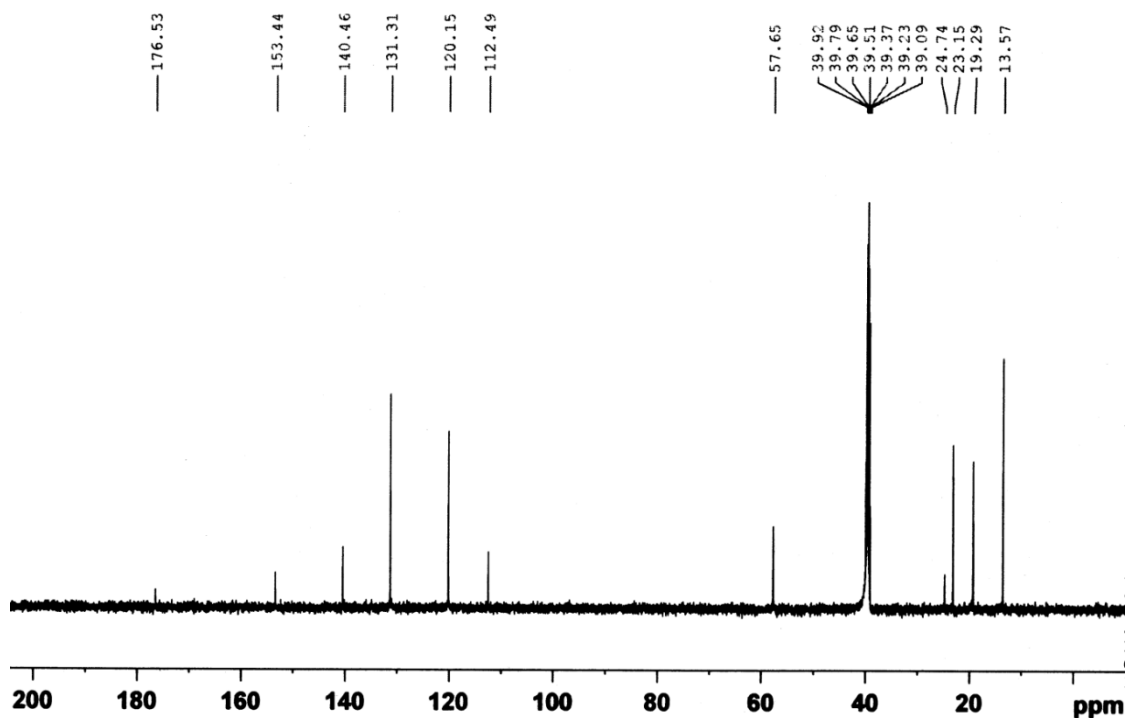

**Figure S23:**  $^{13}\text{C}$  NMR spectrum of complex **2b** in  $\text{DMSO-}d_6$  (Bruker-150 MHz) at 298 K.  $\delta$  (ppm) 13.57 (4C, n-TBA- $\text{CH}_3$ ), 19.29 (4C, n-TBA- $\text{CH}_2$ ), 23.15 (4C, n-TBA- $\text{CH}_2$ ), 24.74 (1C, Acetate- $\text{CH}_3$ ), 57.65 (4C, n-TBA- $\text{N}^+\text{CH}_2$ ), 112.49 (2C, ArH), 120.15 (4C, ArH), 131.31 (4C, ArH), 140.46 (2C, ArH), 153.44 (1C, C=O) and 176.53 (Acetate- $\text{COO}^-$ ).

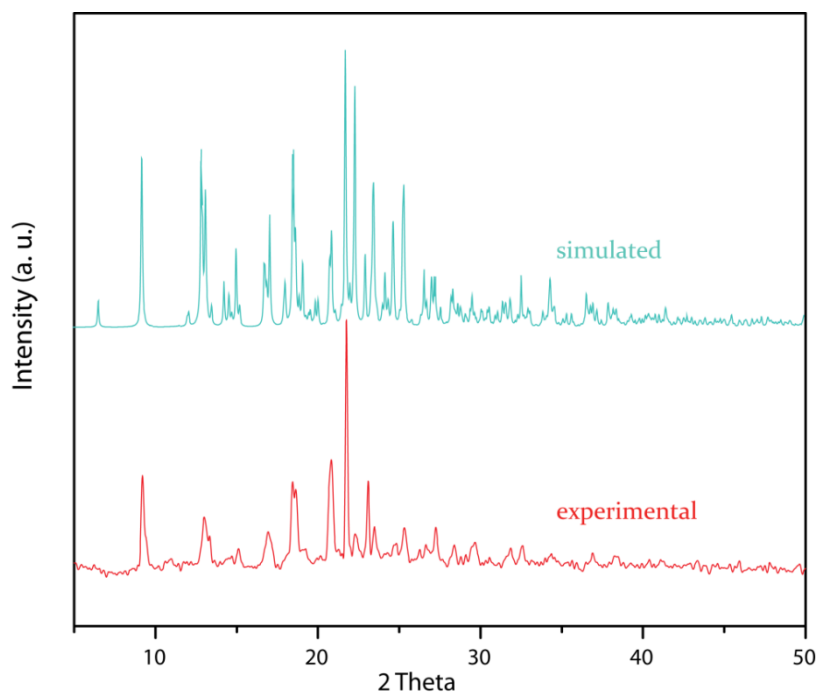

**Figure S24.** Powder X-ray diffraction patterns of isolated crystals of **2b**: experimental is in green colour and simulated pattern is in red colour.

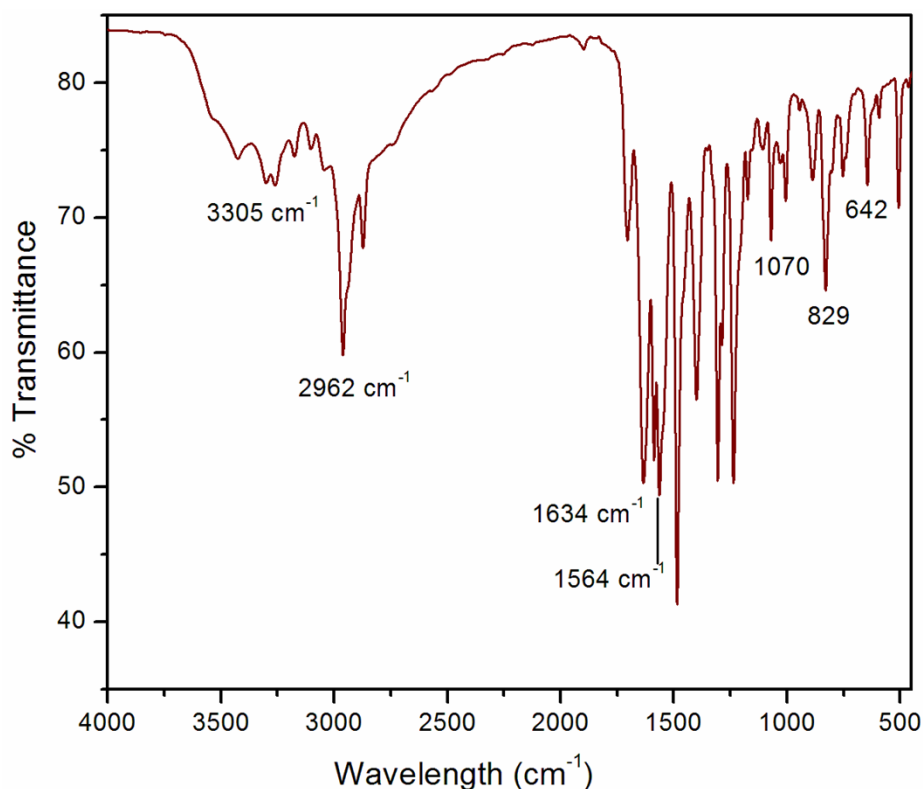

**Figure S25.** FT-IR spectrum of complex **2b** recorded in KBr pellet.  $\nu$   $\text{cm}^{-1}$ : 642(-COO deformation), 829 (-COO), 1070(C-Br), 1236 (C-N), 1564 (C=C), 1634 (-C=O), 2962 (C-H), 3305 (N-H).

**Table S1.** Crystallographic parameters and refinement details.

| Parameters      | <b>L<sub>1</sub></b>                                     | <b>1a</b>                                                  | <b>1b</b>                                                  | <b>L<sub>2</sub></b>                                   | <b>2b</b>                                                   |
|-----------------|----------------------------------------------------------|------------------------------------------------------------|------------------------------------------------------------|--------------------------------------------------------|-------------------------------------------------------------|
| CCDC            | 973820                                                   | 973821                                                     | 973822                                                     | 973823                                                 | 973825                                                      |
| Formula         | $\text{C}_{13}\text{H}_{10}\text{I}_2\text{N}_2\text{O}$ | $\text{C}_{30}\text{H}_{47}\text{I}_2\text{N}_3\text{O}_4$ | $\text{C}_{31}\text{H}_{49}\text{I}_2\text{N}_3\text{O}_3$ | $\text{C}_{13}\text{H}_{10}\text{Br}_2\text{N}_2$<br>O | $\text{C}_{31}\text{H}_{49}\text{Br}_2\text{N}_3\text{O}_3$ |
| Fw              | 464.03                                                   | 767.51                                                     | 765.53                                                     | 370.03                                                 | 671.53                                                      |
| Crystal system  | Monoclinic                                               | Monoclinic                                                 | Monoclinic                                                 | Monoclinic                                             | Monoclinic                                                  |
| Space group     | C2/c                                                     | C 2                                                        | P 21/c                                                     | C2/c                                                   | P 21/c                                                      |
| a/Å             | 29.2420(9)                                               | 23.9471(7)                                                 | 8.8809(3)                                                  | 28.0636(16)                                            | 9.5024(5)                                                   |
| b/Å             | 4.6414(10)                                               | 8.3931(2)                                                  | 21.0697(6)                                                 | 4.6085(3)                                              | 18.9054(10)                                                 |
| c/Å             | 10.1031(3)                                               | 17.0344(5)                                                 | 18.9452(6)                                                 | 10.0857(6)                                             | 19.3877(13)                                                 |
| $\alpha/^\circ$ | 90.00                                                    | 90.00                                                      | 90.00                                                      | 90.00                                                  | 90.00                                                       |
| $\beta/^\circ$  | 94.122(2)                                                | 96.4510(10)                                                | 97.815(2)                                                  | 95.469(4)                                              | 99.771(5)                                                   |
| $\gamma/^\circ$ | 90.00                                                    | 90.00                                                      | 90.00                                                      | 90.00                                                  | 90.00                                                       |

|                                       |            |             |             |             |           |
|---------------------------------------|------------|-------------|-------------|-------------|-----------|
| V/Å <sup>3</sup>                      | 1367.68(7) | 3402.07(16) | 3512.06(19) | 1298.46(14) | 3432.4(3) |
| Z                                     | 4          | 4           | 4           | 4           | 4         |
| Dc/g cm <sup>-3</sup>                 | 2.254      | 1.498       | 1.448       | 1.893       | 1.299     |
| $\mu$ Mo K $\alpha$ /mm <sup>-1</sup> | 4.588      | 1.884       | 1.823       | 6.231       | 2.394     |
| T/K                                   | 298(2)     | 298(2)      | 298(2)      | 298(2)      | 298(2)    |
| $\theta$ max.                         | 28.30      | 23.64       | 23.12       | 26.00       | 23.23     |
| Total no.of reflections               | 9542       | 19895       | 43647       | 8968        | 15160     |
| Independent reflections               | 1694       | 8369        | 8711        | 1596        | 8817      |
| Observed reflections                  | 1541       | 4435        | 4605        | 1040        | 5893      |
| Parameters refined                    | 83         | 384         | 358         | 83          | 426       |
| $R_1, I > 2\sigma(I)$                 | 0.0292     | 0.0421      | 0.0612      | 0.0377      | 0.0590    |
| $wR_2, I > 2\sigma(I)$                | 0.0996     | 0.1107      | 0.1786      | 0.1119      | 0.1226    |
| $R_1$ , (all data)                    | 0.0315     | 0.0604      | 0.1155      | 0.0697      | 0.1794    |
| $wR_2$ (all data)                     | 0.1052     | 0.1203      | 0.2080      | 0.1397      | 0.1652    |
| GOF ( $F^2$ )                         | 0.909      | 1.074       | 1.082       | 0.920       | 1.003     |

**Table S2.** Details of Hydrogen Bonding contacts in the Complexes **1a-b** and **2a-b**.

| complex   | D–H...A <sup>a</sup> | d(D...A)/Å | d(H...A)/Å | $\angle$ D–H...A/° |
|-----------|----------------------|------------|------------|--------------------|
| <b>1a</b> | N1–H...O2            | 2.761(7)   | 1.921(5)   | 165.2(4)           |
|           | N2–H...O3            | 2.909(6)   | 2.104(4)   | 155.4(3)           |
|           | C6–H...O2            | 3.292(7)   | 2.571(4)   | 134.6(4)           |
|           | C13–H...O3           | 3.382(6)   | 2.644(4)   | 136.8(4)           |
| <b>1b</b> | N1–H...O3            | 2.835(6)   | 1.985(4)   | 169.3(3)           |
|           | N2–H...O2            | 2.833(5)   | 1.974(4)   | 175.8(3)           |
|           | C3–H...O3            | 3.384(8)   | 2.648(5)   | 136.4(4)           |
|           | C9–H...O2            | 3.449(7)   | 2.723(4)   | 135.4(4)           |
| <b>2b</b> | N1–H...O3            | 3.454(5)   | 2.728(4)   | 142.8(3)           |
|           | N2–H...O3            | 2.809 (5)  | 1.976(4)   | 162.5(3)           |
|           | N1–H...O2            | 2.778(5)   | 1.962(3)   | 157.8(3)           |
|           | C3–H...O2            | 3.315(7)   | 2.661(4)   | 128.0(3)           |

<sup>a</sup> D= Donor, A=Acceptor



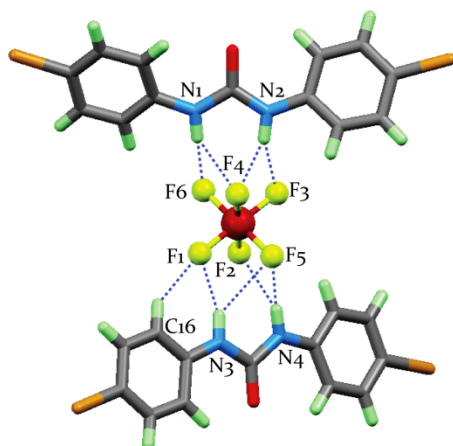

**Figure S26.** Ball-and-stick representation depicting the H-bonding contacts of complex **2a** (CCDC no. 973824) on  $\text{SiF}_6^{2-}$  (*n*-TBA cations are omitted for clarity of the presentation).

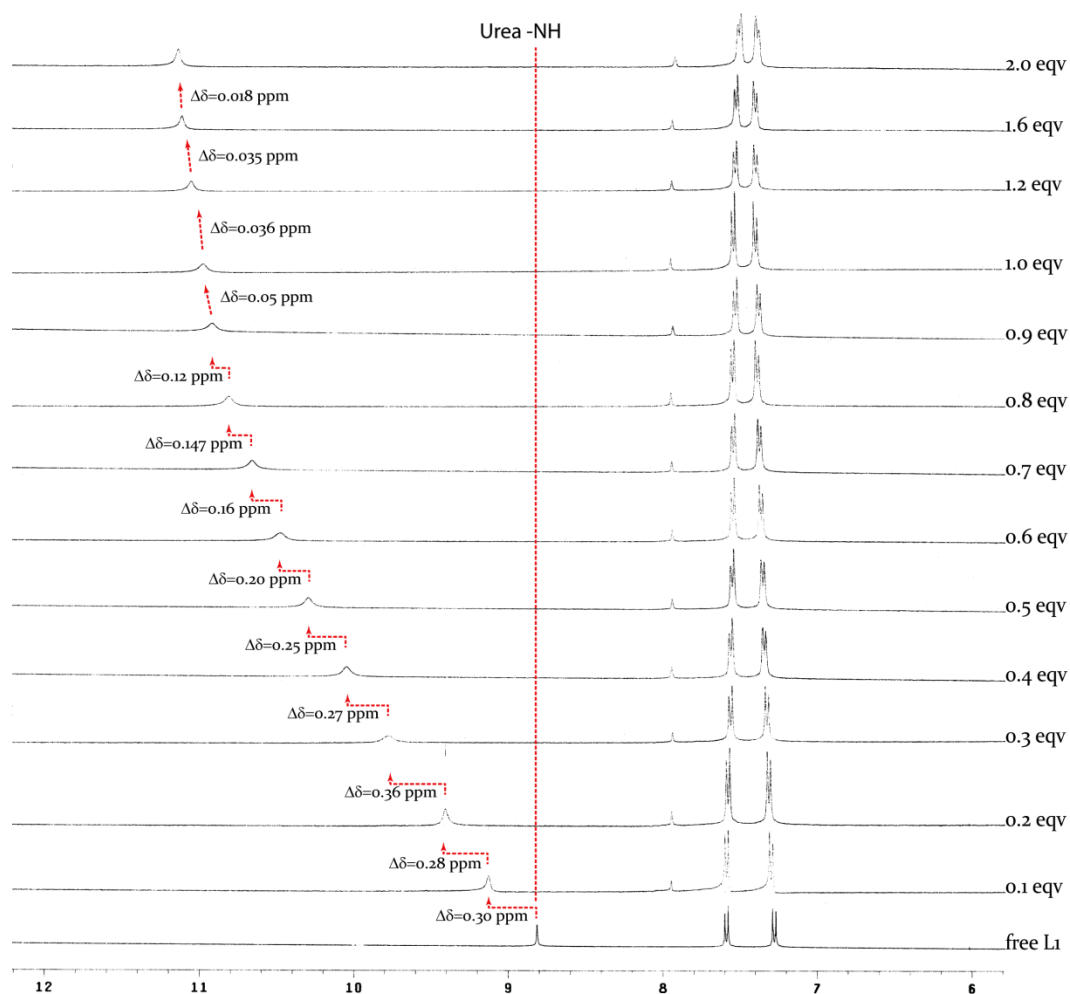

**Figure S27.** Expanded partial  $^1\text{H}$  NMR spectra of  $\text{L}_1$  upon titration with  $\text{HCO}_3^-$  (TEA) in  $\text{DMSO}-d_6$ .

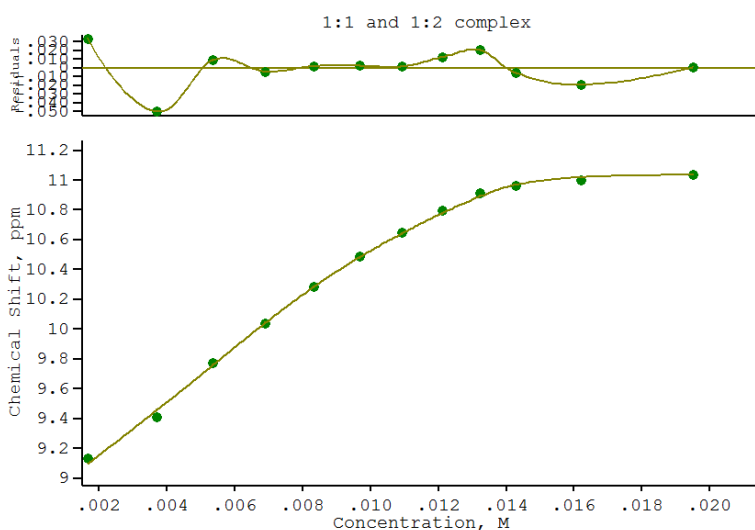

**Figure S28.** Fit plot obtained in the determination of  $K_a$  using urea-NH resonance by WinEQNMR2 for  $L_1$  and bicarbonate anion.

### Calculations for the titration of $L_1$ with the bicarbonate anion.

```

                                out
Calculations by WinEQNMR2 Version 2.00 by Michael J. Hynes
Program run at 16:21:30  on 01/08/2014

1:1 and 1:2 complex

Equilibrium constants are log10 values

NO.  A  PARAMETER  DELTA  ERROR  CONDITION  DESCRIPTION
  1  1  5.15685E+00  3.200E-02  7.732E-01  1.962E+02  K11
  2  1  9.06291E+00  3.600E-02  1.194E+00  1.245E+02  K12
  3  1  8.81662E+00  1.000E-02  3.401E-02  2.376E+00  Free Ligand
  4  1  1.04618E+01  1.000E-02  9.592E-02  3.082E+01  complex11
  5  1  1.10428E+01  1.000E-02  3.004E-02  5.233E+00  complex12

ØRMS ERROR = 2.58E-02  MAX ERROR = 4.98E-02  AT OBS.NO.  2
RESIDUALS SQUARED = 4.67E-03
RFACTOR = 0.1898 PERCENT

NO.  A  EXPT. DEL  CALC. DEL  RESIDUAL  % DEV  WEIGHT  HCO3-
L1
  1  1  9.1320E+00  9.0992E+00  3.2840E-02  3.5961E-01  1.0000E+00  1.6667E-03
9.6154E-03  0.0000E+00
  2  1  9.4100E+00  9.4598E+00 -4.9824E-02 -5.2948E-01  1.0000E+00  3.7037E-03
9.2593E-03  0.0000E+00
  3  1  9.7730E+00  9.7635E+00  9.5291E-03  9.7504E-02  1.0000E+00  5.3571E-03
8.9286E-03  0.0000E+00
  4  1  1.0039E+01  1.0043E+01 -4.2152E-03 -4.1989E-02  1.0000E+00  6.8966E-03
8.6207E-03  0.0000E+00
  5  1  1.0288E+01  1.0286E+01  1.9436E-03  1.8892E-02  1.0000E+00  8.3333E-03
8.3333E-03  0.0000E+00
  6  1  1.0487E+01  1.0485E+01  2.2364E-03  2.1325E-02  1.0000E+00  9.6774E-03
8.0645E-03  0.0000E+00
  7  1  1.0647E+01  1.0646E+01  1.4744E-03  1.3848E-02  1.0000E+00  1.0937E-02
7.8125E-03  0.0000E+00
  8  1  1.0794E+01  1.0781E+01  1.2708E-02  1.1773E-01  1.0000E+00  1.2121E-02
7.5758E-03  0.0000E+00
  9  1  1.0913E+01  1.0893E+01  2.0475E-02  1.8762E-01  1.0000E+00  1.3235E-02
7.3529E-03  0.0000E+00
 10  1  1.0965E+01  1.0971E+01 -5.5246E-03 -5.0384E-02  1.0000E+00  1.4286E-02
7.1429E-03  0.0000E+00
 11  1  1.1001E+01  1.1020E+01 -1.9384E-02 -1.7621E-01  1.0000E+00  1.6216E-02
6.7568E-03  0.0000E+00
 12  1  1.1035E+01  1.1034E+01  7.3433E-04  6.6545E-03  1.0000E+00  1.9512E-02
6.0976E-03  0.0000E+00

TOLERANCE ON SUM OF SQUARES  0.0100
TOLERANCE ON EIGEN VALUES  0.0001
CONVERGANCE AFTER  38  ITERATIONS

```

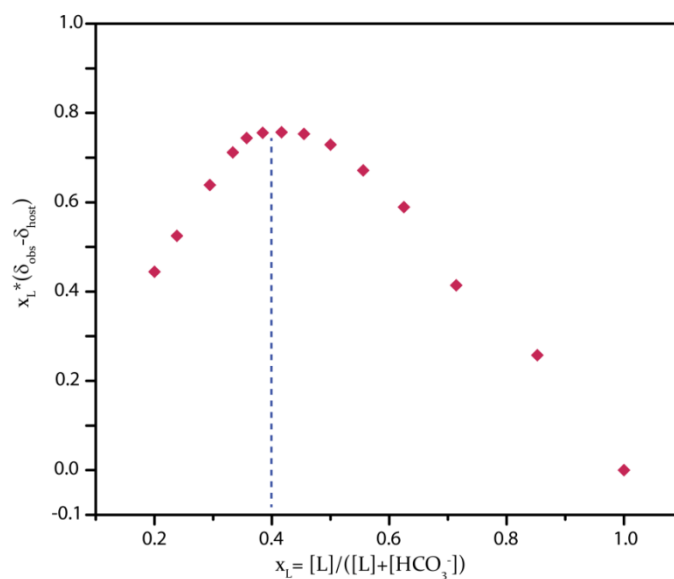

**Figure S29.** Job plot using urea-NH resonances for  $L_1$  and bicarbonate anion, showing a maximum at 0.4 mole fraction value of the receptor for the multiple equilibria existing between 1: 1 and 1 : 2 complexes.

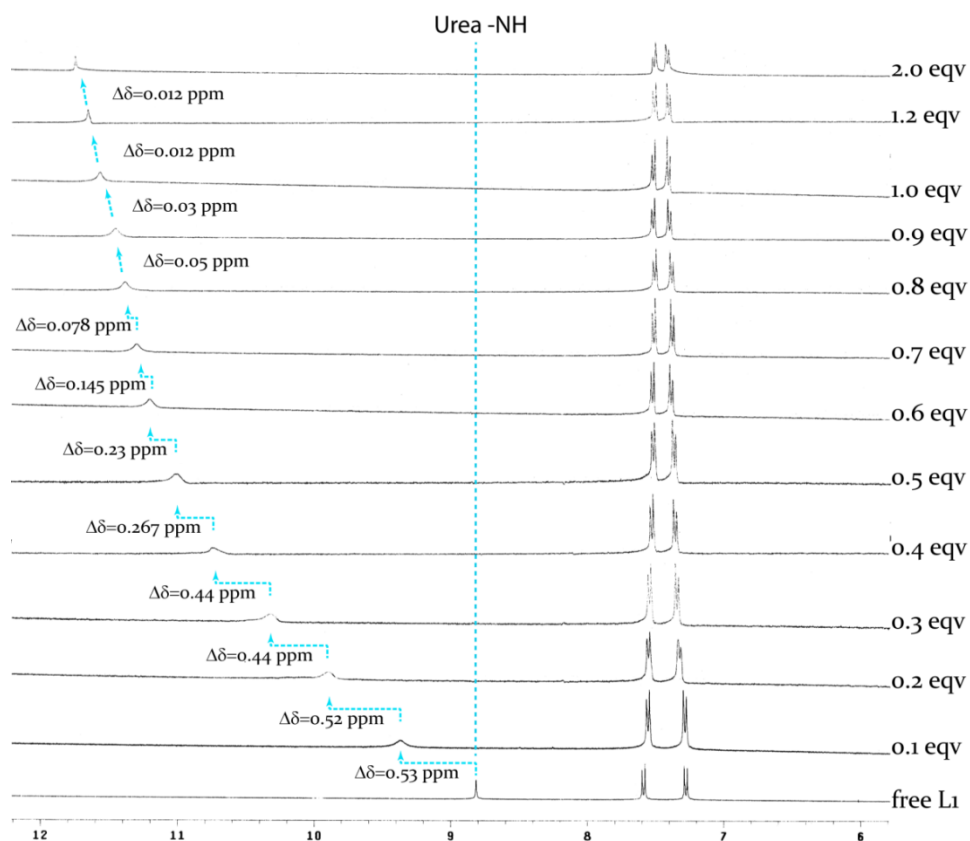

**Figure S30.** Expanded partial  $^1\text{H}$  NMR spectra of  $L_1$  upon titration with  $\text{AcO}^-(n\text{-TBA})$  in  $\text{DMSO-}d_6$ .

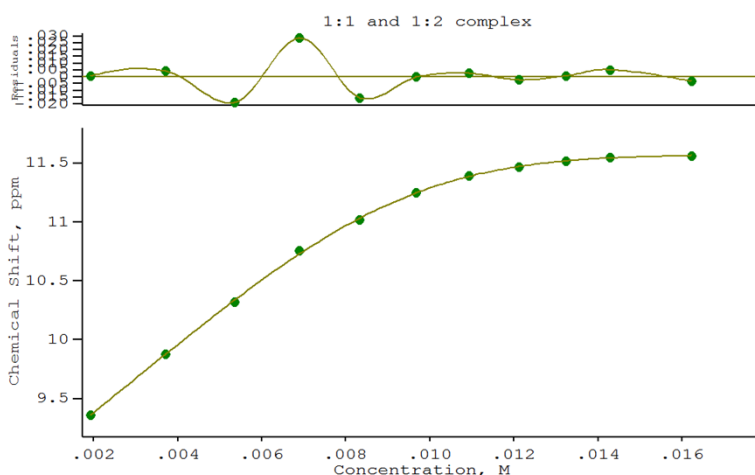

**Figure S31.** Fit plot obtained in the determination of  $K_a$  using urea-NH resonance by WinEQNMR2 for  $L_1$  and acetate anion.

**Calculations for the titration of  $L_1$  with the acetate anion.**

```

                                out
Calculations by WinEQNMR2 Version 2.00 by Michael J. Hynes
Program run at 16:49:45   on 01/08/2014

1:1 and 1:2 complex

Equilibrium constants are log10 values

NO.  A  PARAMETER  DELTA  ERROR  CONDITION  DESCRIPTION
  1  1  3.69465E+00  3.200E-02  2.886E-01  9.752E+02  K11
  2  1  6.33635E+00  3.600E-02  5.488E-01  4.350E+02  K12
  3  1  8.80631E+00  1.000E-02  3.919E-02  9.090E+00  Free Ligand
  4  1  1.17029E+01  1.000E-02  1.717E-01  3.103E+02  complex11
  5  1  1.15518E+01  1.000E-02  6.628E-02  2.386E+01  complex12

ORMS ERROR = 1.58E-02  MAX ERROR = 2.88E-02  AT OBS.NO.  4
RESIDUALS SQUARED = 1.49E-03
RFACTOR = 0.1065 PERCENT

NO.  A  EXPT. DEL  CALC. DEL  RESIDUAL  % DEV  WEIGHT  AcO-  L1
      pH
  1  1  9.3600E+00  9.3595E+00  5.3883E-04  5.7567E-03  1.0000E+00  1.9231E-03
9.6154E-03  0.0000E+00
  2  1  9.8800E+00  9.8757E+00  4.2715E-03  4.3234E-02  1.0000E+00  3.7037E-03
9.2593E-03  0.0000E+00
  3  1  1.0320E+01  1.0339E+01  -1.8932E-02  -1.8345E-01  1.0000E+00  5.3571E-03
8.9286E-03  0.0000E+00
  4  1  1.0759E+01  1.0730E+01  2.8756E-02  2.6728E-01  1.0000E+00  6.8966E-03
8.6207E-03  0.0000E+00
  5  1  1.1019E+01  1.1034E+01  -1.5468E-02  -1.4037E-01  1.0000E+00  8.3333E-03
8.3333E-03  0.0000E+00
  6  1  1.1249E+01  1.1249E+01  -1.8978E-04  -1.6871E-03  1.0000E+00  9.6774E-03
8.0645E-03  0.0000E+00
  7  1  1.1392E+01  1.1390E+01  2.4824E-03  2.1791E-02  1.0000E+00  1.0937E-02
7.8125E-03  0.0000E+00
  8  1  1.1470E+01  1.1472E+01  -2.3661E-03  -2.0628E-02  1.0000E+00  1.2121E-02
7.5758E-03  0.0000E+00
  9  1  1.1520E+01  1.1519E+01  6.9904E-04  6.0681E-03  1.0000E+00  1.3235E-02
7.3529E-03  0.0000E+00
 10  1  1.1550E+01  1.1545E+01  5.1756E-03  4.4810E-02  1.0000E+00  1.4286E-02
7.1429E-03  0.0000E+00
 11  1  1.1562E+01  1.1565E+01  -3.2415E-03  -2.8036E-02  1.0000E+00  1.6216E-02
6.7568E-03  0.0000E+00

TOLERANCE ON SUM OF SQUARES  0.0100
TOLERANCE ON EIGEN VALUES  0.0001
CONVERGANCE AFTER  22  ITERATIONS

```

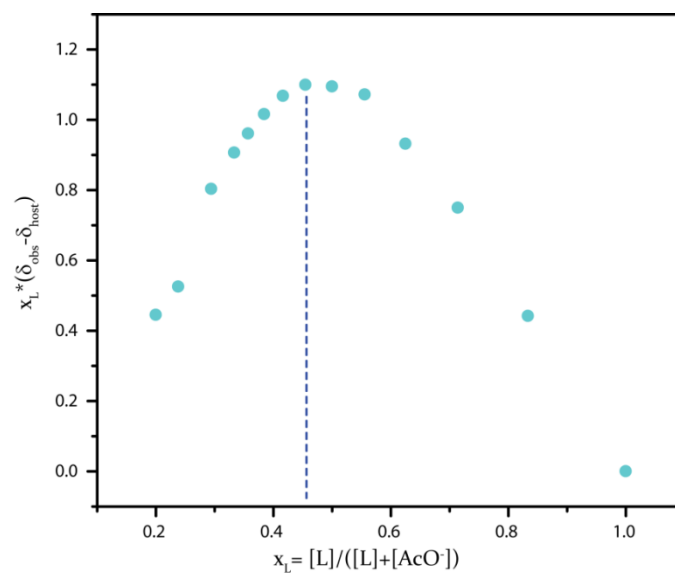

**Figure S32.** Job plot using urea-NH resonances for  $L_1$  and acetate anion, showing a maximum at 0.45 mole fraction value of the receptor for the multiple equilibria existing between 1: 1 and 1 : 2 complexes.

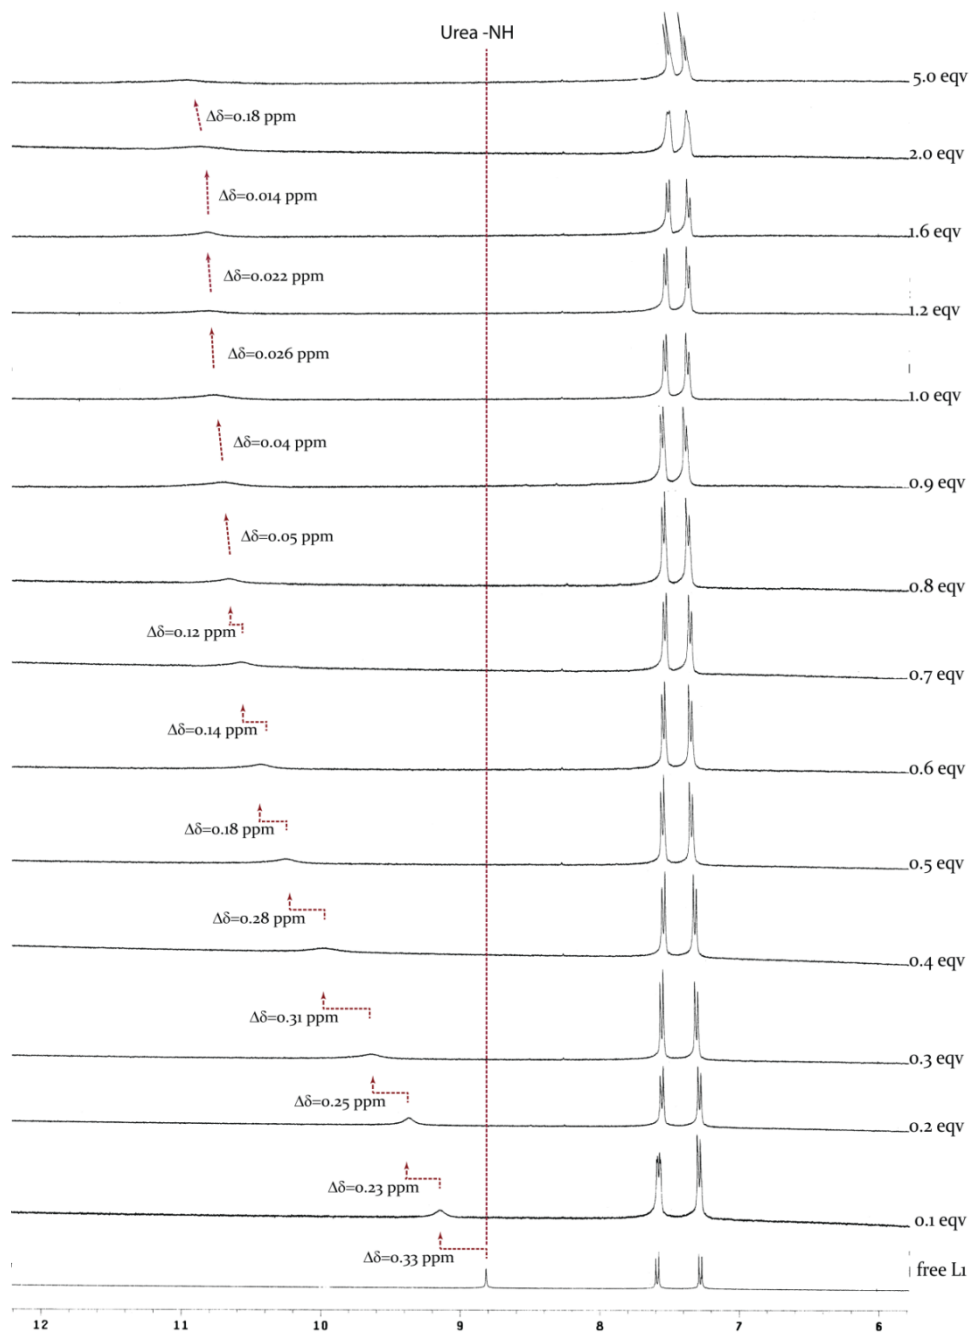

**Figure S33.** Expanded partial  $^1\text{H}$  NMR spectra of  $\text{L}_1$  upon titration with  $\text{F}^-(\text{n-TBA})$  in  $\text{DMSO-}d_6$ .

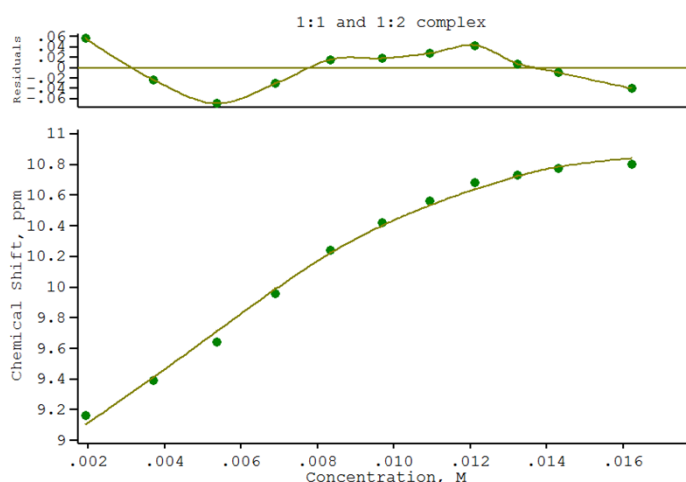

**Figure S34.** Fit plot obtained in the determination of  $K_a$  using urea-NH resonance by WinEQNMR2 for  $L_1$  and fluoride anion.

### Calculations for the titration of $L_1$ with the fluoride anion.

out

Calculations by WinEQNMR2 Version 2.00 by Michael J. Hynes  
 Program run at 18:23:40 on 01/08/2014

1:1 and 1:2 complex

Equilibrium constants are log10 values

| NO. | A | PARAMETER   | DELTA     | ERROR     | CONDITION | DESCRIPTION |
|-----|---|-------------|-----------|-----------|-----------|-------------|
| 1   | 1 | 4.95144E+00 | 3.200E-02 | 2.394E+00 | 3.708E+02 | K11         |
| 2   | 1 | 8.37534E+00 | 3.600E-02 | 4.120E+00 | 4.244E+02 | K12         |
| 3   | 1 | 8.79251E+00 | 1.000E-02 | 7.171E-02 | 2.734E+00 | Free Ligand |
| 4   | 1 | 1.03681E+01 | 1.000E-02 | 1.756E-01 | 3.463E+01 | complex11   |
| 5   | 1 | 1.08952E+01 | 1.000E-02 | 2.520E-01 | 6.255E+01 | complex12   |

0RMS ERROR = 4.91E-02 MAX ERROR = 6.90E-02 AT OBS.NO. 3  
 RESIDUALS SQUARED = 1.45E-02  
 RFACTOR = 0.3544 PERCENT

| NO. | A | EXPT. DEL             | CALC. DEL  | RESIDUAL    | % DEV       | WEIGHT     | F-         | L1 |
|-----|---|-----------------------|------------|-------------|-------------|------------|------------|----|
|     |   | pH                    |            |             |             |            |            |    |
| 1   | 1 | 9.1630E+00            | 9.1053E+00 | 5.7686E-02  | 6.2955E-01  | 1.0000E+00 | 1.9231E-03 |    |
|     |   | 9.6154E-03 0.0000E+00 |            |             |             |            |            |    |
| 2   | 1 | 9.3910E+00            | 9.4135E+00 | -2.2460E-02 | -2.3916E-01 | 1.0000E+00 | 3.7037E-03 |    |
|     |   | 9.2593E-03 0.0000E+00 |            |             |             |            |            |    |
| 3   | 1 | 9.6430E+00            | 9.7120E+00 | -6.8969E-02 | -7.1522E-01 | 1.0000E+00 | 5.3571E-03 |    |
|     |   | 8.9286E-03 0.0000E+00 |            |             |             |            |            |    |
| 4   | 1 | 9.9600E+00            | 9.9897E+00 | -2.9698E-02 | -2.9818E-01 | 1.0000E+00 | 6.8966E-03 |    |
|     |   | 8.6207E-03 0.0000E+00 |            |             |             |            |            |    |
| 5   | 1 | 1.0241E+01            | 1.0225E+01 | 1.6071E-02  | 1.5693E-01  | 1.0000E+00 | 8.3333E-03 |    |
|     |   | 8.3333E-03 0.0000E+00 |            |             |             |            |            |    |
| 6   | 1 | 1.0420E+01            | 1.0402E+01 | 1.8230E-02  | 1.7496E-01  | 1.0000E+00 | 9.6774E-03 |    |
|     |   | 8.0645E-03 0.0000E+00 |            |             |             |            |            |    |
| 7   | 1 | 1.0564E+01            | 1.0536E+01 | 2.8188E-02  | 2.6683E-01  | 1.0000E+00 | 1.0937E-02 |    |
|     |   | 7.8125E-03 0.0000E+00 |            |             |             |            |            |    |
| 8   | 1 | 1.0685E+01            | 1.0642E+01 | 4.3401E-02  | 4.0618E-01  | 1.0000E+00 | 1.2121E-02 |    |
|     |   | 7.5758E-03 0.0000E+00 |            |             |             |            |            |    |
| 9   | 1 | 1.0734E+01            | 1.0726E+01 | 8.1882E-03  | 7.6283E-02  | 1.0000E+00 | 1.3235E-02 |    |
|     |   | 7.3529E-03 0.0000E+00 |            |             |             |            |            |    |
| 10  | 1 | 1.0777E+01            | 1.0786E+01 | -8.7833E-03 | -8.1501E-02 | 1.0000E+00 | 1.4286E-02 |    |
|     |   | 7.1429E-03 0.0000E+00 |            |             |             |            |            |    |
| 11  | 1 | 1.0803E+01            | 1.0843E+01 | -3.9724E-02 | -3.6772E-01 | 1.0000E+00 | 1.6216E-02 |    |
|     |   | 6.7568E-03 0.0000E+00 |            |             |             |            |            |    |

TOLERANCE ON SUM OF SQUARES 0.0100  
 TOLERANCE ON EIGEN VALUES 0.0001  
 CONVERGENCE AFTER 12 ITERATIONS

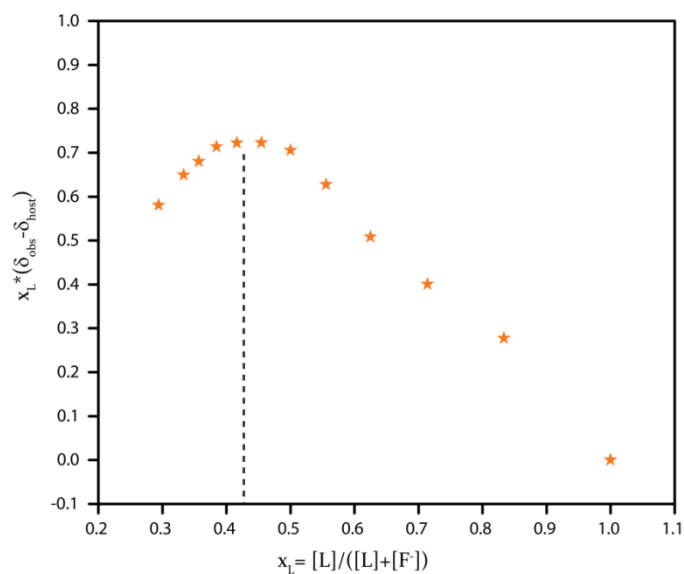

**Figure S35.** Job plot using urea-NH resonances for  $L_1$  and fluoride anion, showing a maximum at 0.43 mole fraction value of the receptor for the multiple equilibria existing between 1: 1 and 1 : 2 complexes.

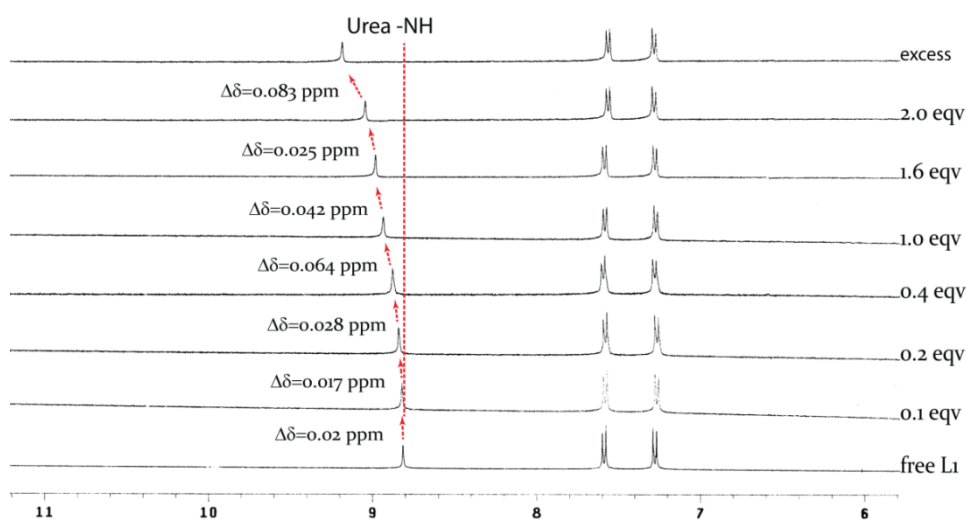

**Figure S36.** Expanded partial  $^1\text{H}$  NMR spectra of  $L_1$  upon titration with  $\text{Cl}^-(\text{TEA})$  in  $\text{DMSO}-d_6$ .



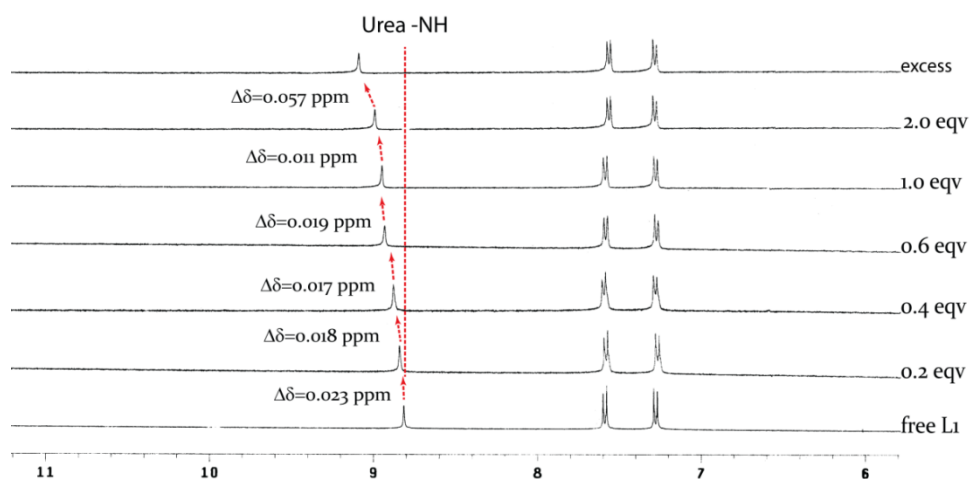

**Figure S37.** Expanded partial  $^1\text{H}$  NMR spectra of  $\text{L}_1$  upon titration with  $\text{Br}^-(\text{n-TBA})$  in  $\text{DMSO-}d_6$ .

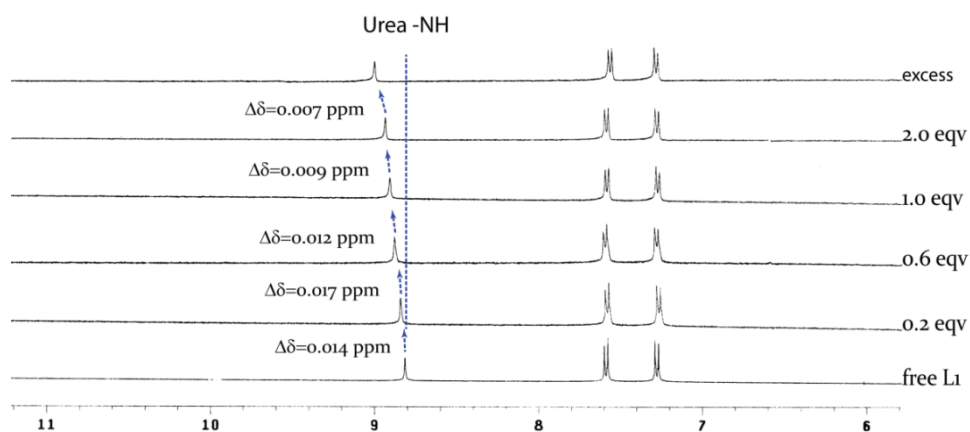

**Figure S38.** Expanded partial  $^1\text{H}$  NMR spectra of  $\text{L}_1$  upon titration with  $\text{I}^-(\text{n-TBA})$  in  $\text{DMSO-}d_6$ .

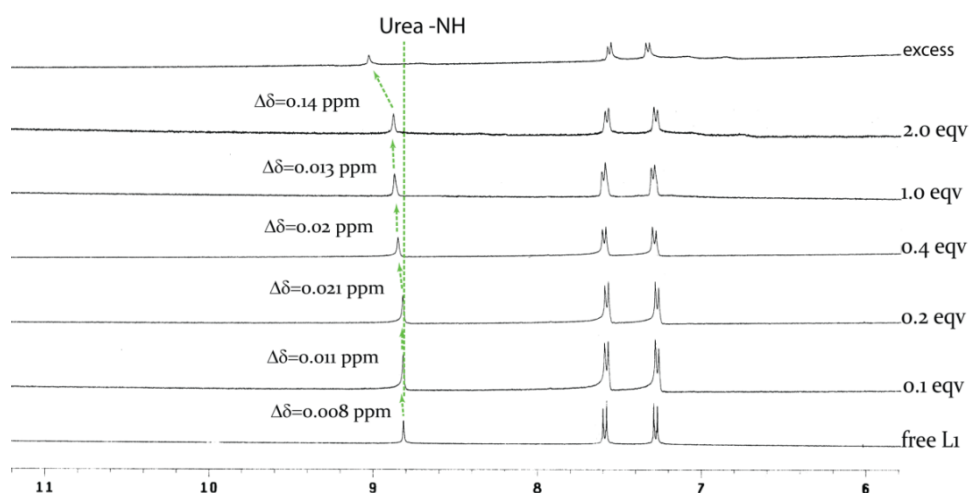

**Figure S39.** Expanded partial  $^1\text{H}$  NMR spectra of  $\text{L}_1$  upon titration with  $\text{HSO}_4^-(\text{n-TBA})$  in  $\text{DMSO-}d_6$ .

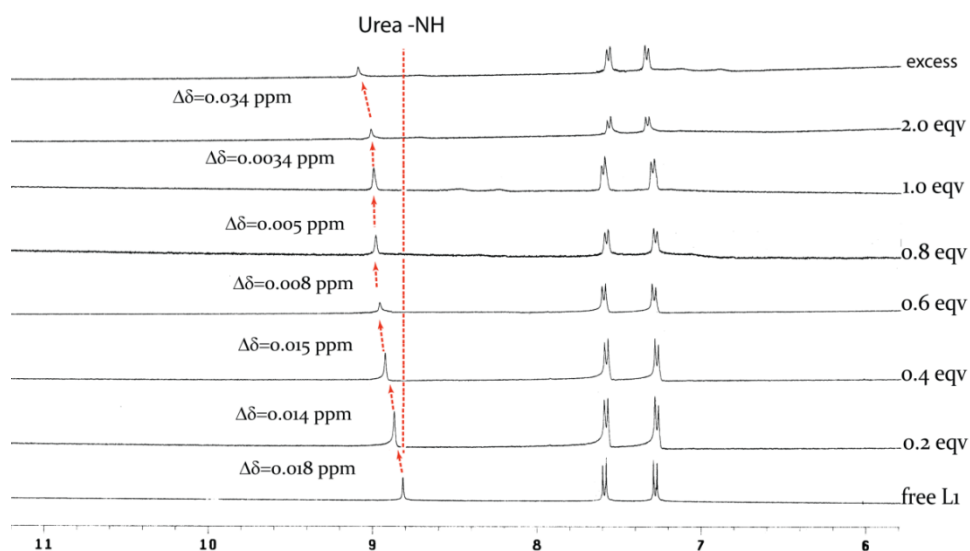

**Figure S40.** Expanded partial  $^1\text{H}$  NMR spectra of  $\text{L}_1$  upon titration with  $\text{H}_2\text{PO}_4^-$  (n-TBA) in  $\text{DMSO}-d_6$

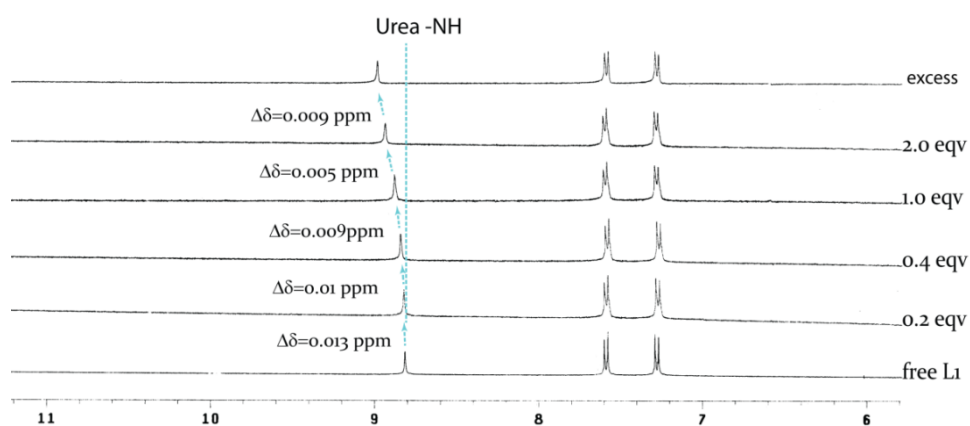

**Figure S41.** Expanded partial  $^1\text{H}$  NMR spectra of  $\text{L}_1$  upon titration with  $\text{NO}_3^-$  (TEA) in  $\text{DMSO}-d_6$ .

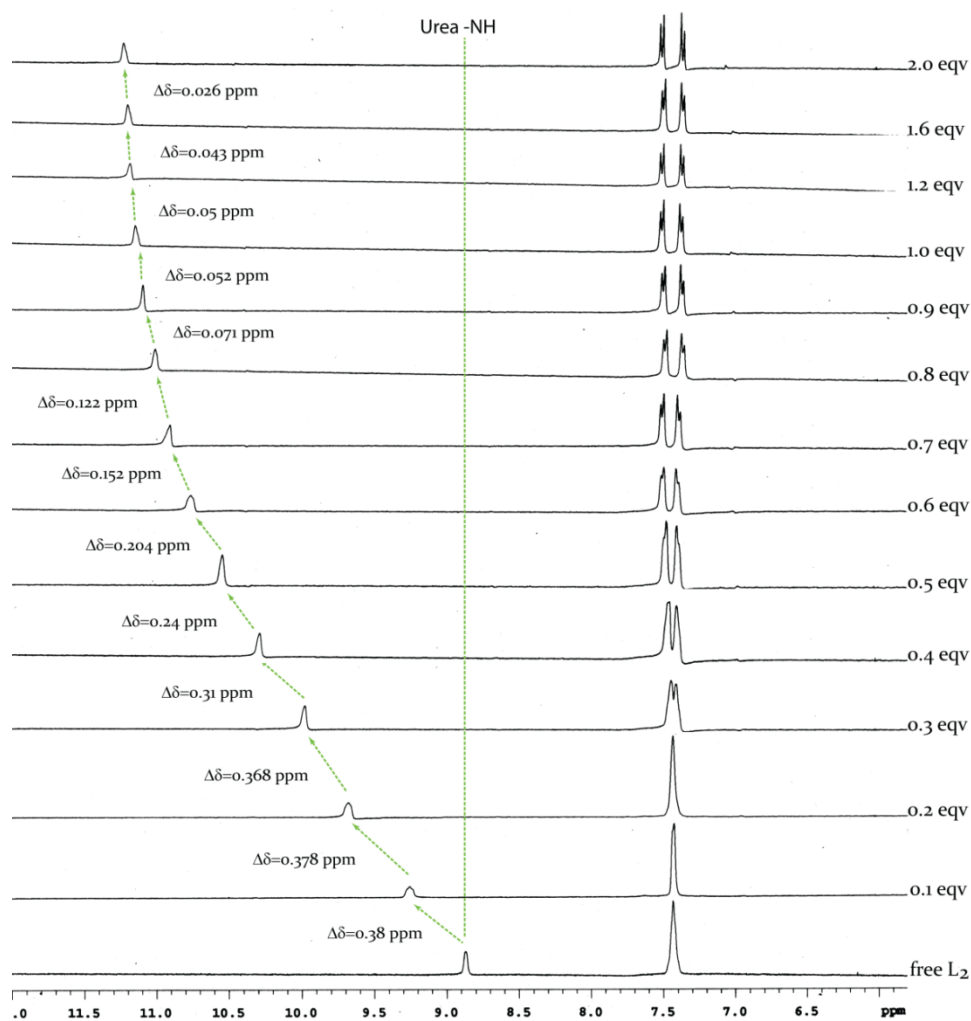

**Figure S42.** Expanded partial  $^1\text{H}$  NMR spectra of  $\text{L}_2$  upon titration with  $\text{AcO}^-(\text{n-TBA})$  in  $\text{DMSO-}d_6$ .

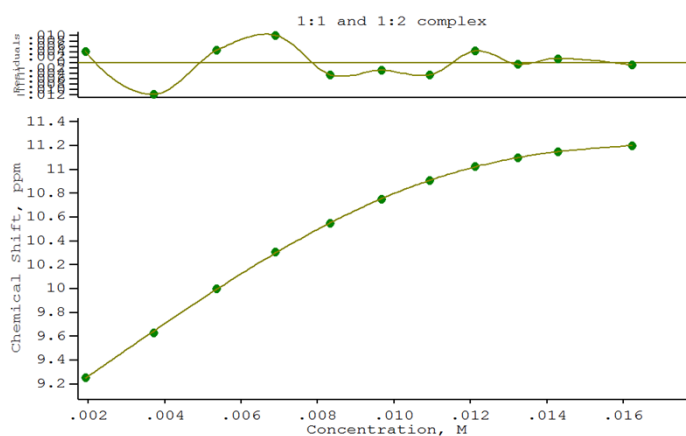

**Figure S43.** Fit plot obtained in the determination of  $K_a$  using urea-NH resonance by WinEQNMR2 for  $\text{L}_2$  and acetate anion.

## Calculations for the titration of L<sub>2</sub> with the acetate anion.

out

Calculations by WinEQNMR2 Version 2.00 by Michael J. Hynes  
 Program run at 17:11:38 on 01/08/2014

1:1 and 1:2 complex

Equilibrium constants are log<sub>10</sub> values

| NO. | A | PARAMETER   | DELTA     | ERROR     | CONDITION | DESCRIPTION |
|-----|---|-------------|-----------|-----------|-----------|-------------|
| 1   | 1 | 3.66075E+00 | 3.200E-02 | 2.202E-01 | 1.322E+03 | K11         |
| 2   | 1 | 6.53355E+00 | 3.600E-02 | 3.391E-01 | 4.054E+02 | K12         |
| 3   | 1 | 8.82052E+00 | 1.000E-02 | 2.464E-02 | 1.627E+01 | Free Ligand |
| 4   | 1 | 1.10966E+01 | 1.000E-02 | 1.299E-01 | 5.727E+02 | complex11   |
| 5   | 1 | 1.12669E+01 | 1.000E-02 | 3.217E-02 | 3.256E+01 | complex12   |

ØRMS ERROR = 7.62E-03 MAX ERROR = 1.16E-02 AT OBS.NO. 2  
 RESIDUALS SQUARED = 3.48E-04  
 RFACTOR = 0.0533 PERCENT

| NO.        | A | EXPT. DEL  | CALC. DEL  | RESIDUAL    | % DEV       | WEIGHT     | AcO-       | L <sub>2</sub> |
|------------|---|------------|------------|-------------|-------------|------------|------------|----------------|
|            |   | pH         |            |             |             |            |            |                |
| 1          | 1 | 9.2540E+00 | 9.2499E+00 | 4.1151E-03  | 4.4468E-02  | 1.0000E+00 | 1.9231E-03 |                |
| 9.6154E-03 |   | 0.0000E+00 |            |             |             |            |            |                |
| 2          | 1 | 9.6320E+00 | 9.6436E+00 | -1.1618E-02 | -1.2062E-01 | 1.0000E+00 | 3.7037E-03 |                |
| 9.2593E-03 |   | 0.0000E+00 |            |             |             |            |            |                |
| 3          | 1 | 1.0000E+01 | 9.9954E+00 | 4.6263E-03  | 4.6263E-02  | 1.0000E+00 | 5.3571E-03 |                |
| 8.9286E-03 |   | 0.0000E+00 |            |             |             |            |            |                |
| 4          | 1 | 1.0310E+01 | 1.0300E+01 | 1.0186E-02  | 9.8799E-02  | 1.0000E+00 | 6.8966E-03 |                |
| 8.6207E-03 |   | 0.0000E+00 |            |             |             |            |            |                |
| 5          | 1 | 1.0549E+01 | 1.0553E+01 | -4.4279E-03 | -4.1975E-02 | 1.0000E+00 | 8.3333E-03 |                |
| 8.3333E-03 |   | 0.0000E+00 |            |             |             |            |            |                |
| 6          | 1 | 1.0753E+01 | 1.0756E+01 | -2.7552E-03 | -2.5622E-02 | 1.0000E+00 | 9.6774E-03 |                |
| 8.0645E-03 |   | 0.0000E+00 |            |             |             |            |            |                |
| 7          | 1 | 1.0905E+01 | 1.0910E+01 | -4.5233E-03 | -4.1479E-02 | 1.0000E+00 | 1.0937E-02 |                |
| 7.8125E-03 |   | 0.0000E+00 |            |             |             |            |            |                |
| 8          | 1 | 1.1027E+01 | 1.1023E+01 | 4.4870E-03  | 4.0691E-02  | 1.0000E+00 | 1.2121E-02 |                |
| 7.5758E-03 |   | 0.0000E+00 |            |             |             |            |            |                |
| 9          | 1 | 1.1098E+01 | 1.1099E+01 | -5.9128E-04 | -5.3278E-03 | 1.0000E+00 | 1.3235E-02 |                |
| 7.3529E-03 |   | 0.0000E+00 |            |             |             |            |            |                |
| 10         | 1 | 1.1150E+01 | 1.1148E+01 | 1.5745E-03  | 1.4121E-02  | 1.0000E+00 | 1.4286E-02 |                |
| 7.1429E-03 |   | 0.0000E+00 |            |             |             |            |            |                |
| 11         | 1 | 1.1200E+01 | 1.1201E+01 | -8.4114E-04 | -7.5102E-03 | 1.0000E+00 | 1.6216E-02 |                |
| 6.7568E-03 |   | 0.0000E+00 |            |             |             |            |            |                |

TOLERANCE ON SUM OF SQUARES 0.0100  
 TOLERANCE ON EIGEN VALUES 0.0001  
 CONVERGANCE AFTER 35 ITERATIONS

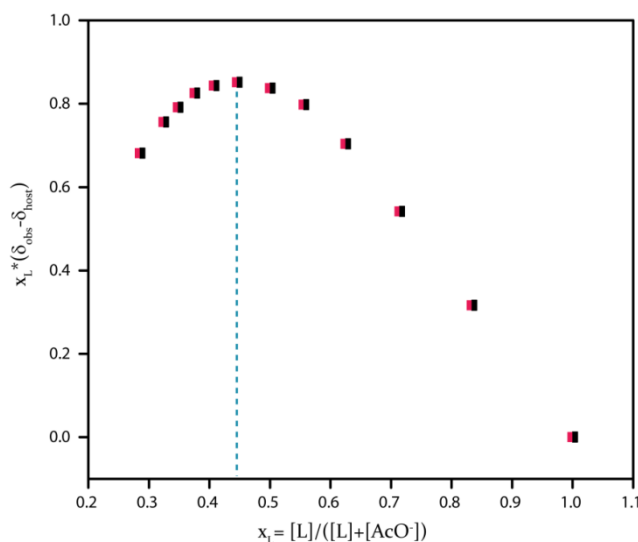

**Figure S44.** Job plot using urea-NH resonances for L<sub>2</sub> and acetate anion, showing a maximum at 0.45 mole fraction value of the receptor for the multiple equilibria existing between 1: 1 and 1 : 2 complexes.

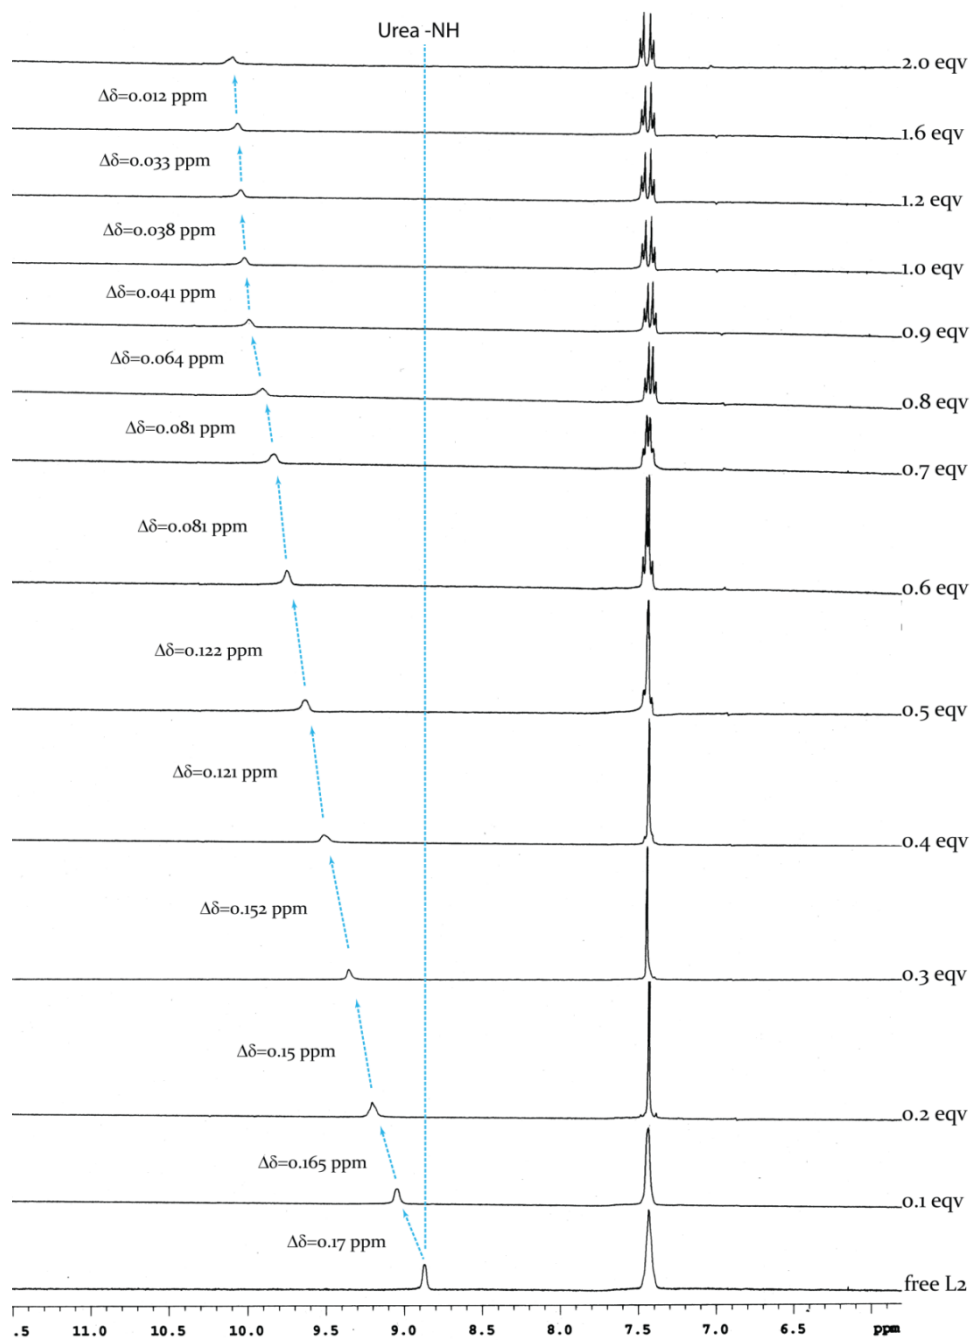

**Figure S45.** Expanded partial  $^1\text{H}$  NMR spectra of  $\text{L}_2$  upon titration with  $\text{HCO}_3^-$  (TEA) in  $\text{DMSO}-d_6$ .

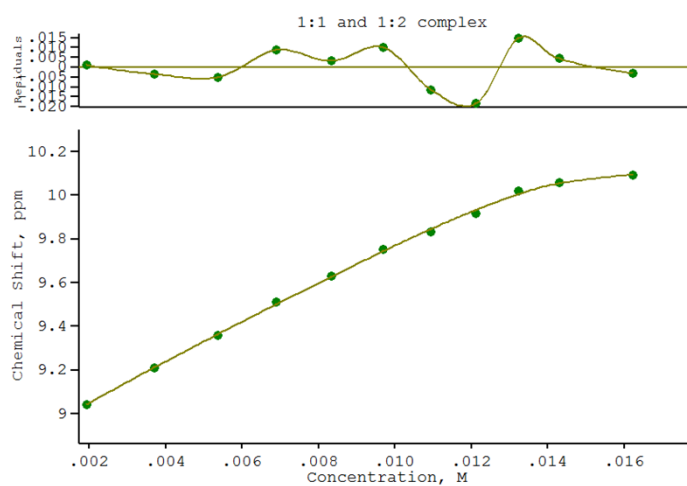

**Figure S46.** Fit plot obtained in the determination of  $K_a$  using urea-NH resonance by WinEQNMR2 for  $L_2$  and bicarbonate anion.

## Calculations for the titration of L<sub>2</sub> with the bicarbonate anion.

out

Calculations by WinEQNMR2 Version 2.00 by Michael J. Hynes  
 Program run at 18:30:16 on 01/08/2014

1:1 and 1:2 complex

Equilibrium constants are log10 values

| NO. | A | PARAMETER   | DELTA     | ERROR     | CONDITION | DESCRIPTION |
|-----|---|-------------|-----------|-----------|-----------|-------------|
| 1   | 1 | 3.31956E+00 | 3.200E-02 | 1.596E+00 | 7.560E+03 | K11         |
| 2   | 1 | 6.78632E+00 | 3.600E-02 | 1.339E+00 | 7.126E+02 | K12         |
| 3   | 1 | 8.83889E+00 | 1.000E-02 | 9.227E-02 | 1.098E+02 | Free Ligand |
| 4   | 1 | 1.00942E+01 | 1.000E-02 | 1.259E+00 | 6.274E+03 | complex11   |
| 5   | 1 | 1.01112E+01 | 1.000E-02 | 8.686E-02 | 1.405E+02 | complex12   |

ØRMS ERROR = 1.26E-02 MAX ERROR = 1.83E-02 AT OBS.NO. 8  
 RESIDUALS SQUARED = 9.47E-04  
 RFACTOR = 0.0958 PERCENT

| NO. | A | EXPT. DEL  | CALC. DEL  | RESIDUAL    | % DEV       | WEIGHT     | HCO <sub>3</sub> - |
|-----|---|------------|------------|-------------|-------------|------------|--------------------|
| L2  |   | pH         |            |             |             |            |                    |
| 1   | 1 | 9.0440E+00 | 9.0429E+00 | 1.1396E-03  | 1.2601E-02  | 1.0000E+00 | 1.9231E-03         |
|     |   |            |            | 9.6154E-03  |             | 0.0000E+00 |                    |
| 2   | 1 | 9.2090E+00 | 9.2125E+00 | -3.4571E-03 | -3.7540E-02 | 1.0000E+00 | 3.7037E-03         |
|     |   |            |            | 9.2593E-03  |             | 0.0000E+00 |                    |
| 3   | 1 | 9.3590E+00 | 9.3641E+00 | -5.0631E-03 | -5.4098E-02 | 1.0000E+00 | 5.3571E-03         |
|     |   |            |            | 8.9286E-03  |             | 0.0000E+00 |                    |
| 4   | 1 | 9.5110E+00 | 9.5023E+00 | 8.7280E-03  | 9.1768E-02  | 1.0000E+00 | 6.8966E-03         |
|     |   |            |            | 8.6207E-03  |             | 0.0000E+00 |                    |
| 5   | 1 | 9.6320E+00 | 9.6288E+00 | 3.2377E-03  | 3.3614E-02  | 1.0000E+00 | 8.3333E-03         |
|     |   |            |            | 8.3333E-03  |             | 0.0000E+00 |                    |
| 6   | 1 | 9.7540E+00 | 9.7437E+00 | 1.0272E-02  | 1.0531E-01  | 1.0000E+00 | 9.6774E-03         |
|     |   |            |            | 8.0645E-03  |             | 0.0000E+00 |                    |
| 7   | 1 | 9.8350E+00 | 9.8463E+00 | -1.1306E-02 | -1.1495E-01 | 1.0000E+00 | 1.0937E-02         |
|     |   |            |            | 7.8125E-03  |             | 0.0000E+00 |                    |
| 8   | 1 | 9.9160E+00 | 9.9343E+00 | -1.8341E-02 | -1.8496E-01 | 1.0000E+00 | 1.2121E-02         |
|     |   |            |            | 7.5758E-03  |             | 0.0000E+00 |                    |
| 9   | 1 | 1.0021E+01 | 1.0006E+01 | 1.4876E-02  | 1.4845E-01  | 1.0000E+00 | 1.3235E-02         |
|     |   |            |            | 7.3529E-03  |             | 0.0000E+00 |                    |
| 10  | 1 | 1.0059E+01 | 1.0054E+01 | 4.5424E-03  | 4.5157E-02  | 1.0000E+00 | 1.4286E-02         |
|     |   |            |            | 7.1429E-03  |             | 0.0000E+00 |                    |
| 11  | 1 | 1.0092E+01 | 1.0095E+01 | -3.1137E-03 | -3.0854E-02 | 1.0000E+00 | 1.6216E-02         |
|     |   |            |            | 6.7568E-03  |             | 0.0000E+00 |                    |

TOLERANCE ON SUM OF SQUARES 0.0100  
 TOLERANCE ON EIGEN VALUES 0.0001  
 CONVERGANCE AFTER 16 ITERATIONS

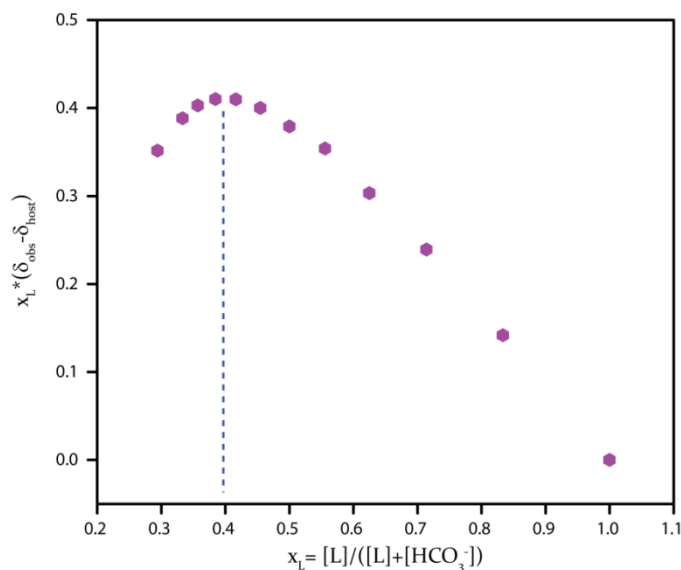

**Figure S47.** Job plot using urea-NH resonances for L<sub>2</sub> and bicarbonate anion, showing a maximum at 0.4 mole fraction value of the receptor for the multiple equilibria

existing between 1 : 1 and 1 : 2 complexes.

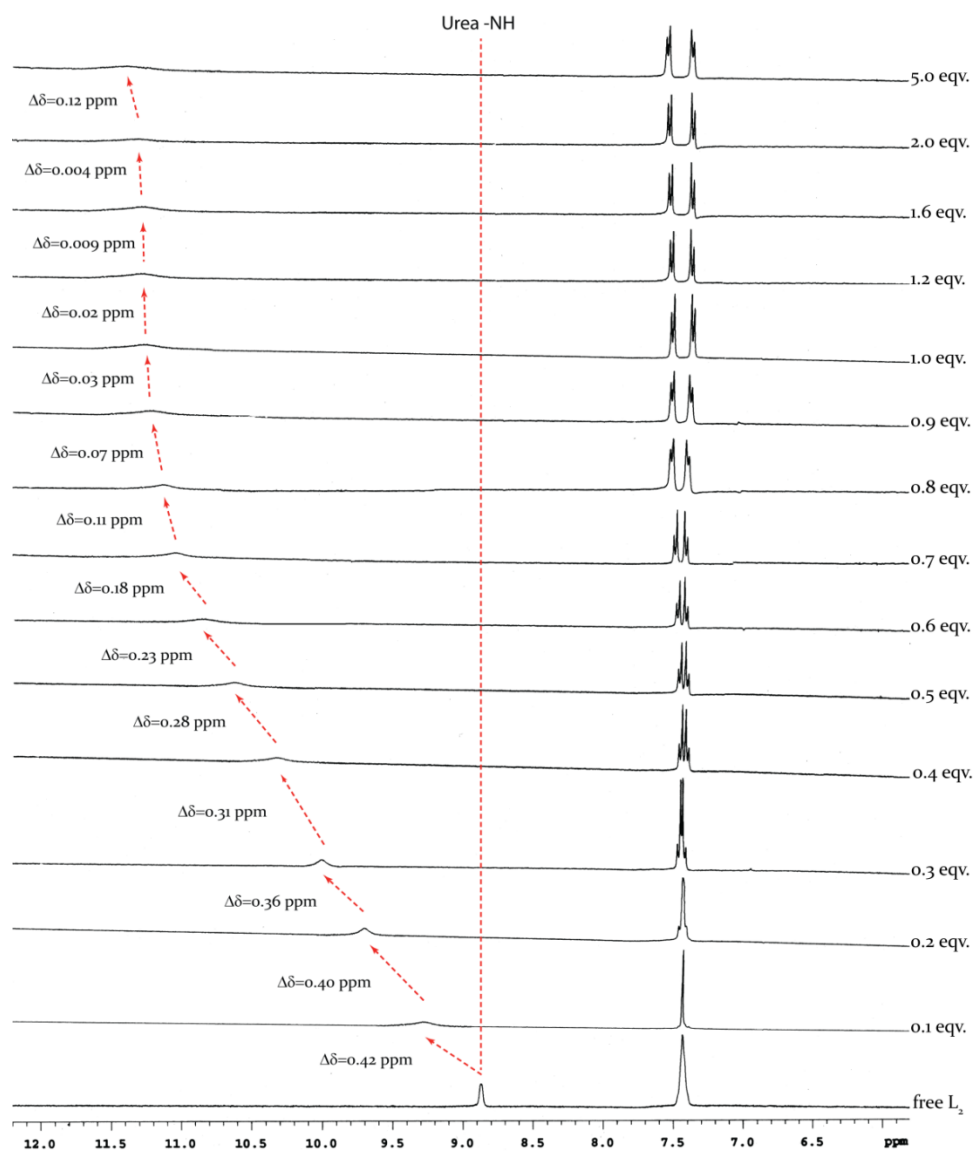

**Figure S48.** Expanded partial  $^1\text{H}$  NMR spectra of  $L_2$  upon titration with  $\text{F}^-(\text{n-TBA})$  in  $\text{DMSO-}d_6$ .



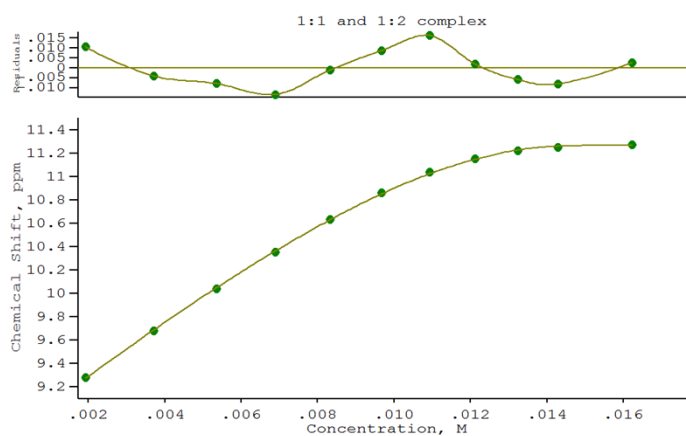

**Figure S49.** Fit plot obtained in the determination of  $K_a$  using urea-NH resonance by WinEQNMR2 for  $L_2$  and fluoride anion.

## Calculations for the titration of L<sub>2</sub> with the fluoride anion.

out

Calculations by WinEQNMR2 Version 2.00 by Michael J. Hynes  
 Program run at 18:38:25 on 01/08/2014

1:1 and 1:2 complex

Equilibrium constants are log<sub>10</sub> values

| NO. | A | PARAMETER   | DELTA     | ERROR     | CONDITION | DESCRIPTION |
|-----|---|-------------|-----------|-----------|-----------|-------------|
| 1   | 1 | 4.39668E+00 | 3.200E-02 | 1.177E+00 | 2.276E+04 | K11         |
| 2   | 1 | 8.24536E+00 | 3.600E-02 | 2.073E+00 | 1.599E+04 | K12         |
| 3   | 1 | 8.80584E+00 | 1.000E-02 | 4.867E-02 | 2.747E+01 | Free Ligand |
| 4   | 1 | 1.12942E+01 | 1.000E-02 | 3.078E-01 | 9.149E+02 | complex11   |
| 5   | 1 | 1.12707E+01 | 1.000E-02 | 1.622E-02 | 5.927E+00 | complex12   |

ØRMS ERROR = 1.17E-02 MAX ERROR = 1.62E-02 AT OBS.NO. 7  
 RESIDUALS SQUARED = 8.16E-04  
 RFACTOR = 0.0809 PERCENT

| NO. | A | EXPT. DEL  | CALC. DEL  | RESIDUAL    | % DEV       | WEIGHT     | F-         | L2 |
|-----|---|------------|------------|-------------|-------------|------------|------------|----|
|     |   | pH         |            |             |             |            |            |    |
| 1   | 1 | 9.2840E+00 | 9.2734E+00 | 1.0628E-02  | 1.1447E-01  | 1.0000E+00 | 1.9231E-03 |    |
| 2   | 1 | 9.6154E-03 | 0.0000E+00 |             |             |            |            |    |
| 2   | 1 | 9.6840E+00 | 9.6879E+00 | -3.8710E-03 | -3.9973E-02 | 1.0000E+00 | 3.7037E-03 |    |
| 3   | 1 | 9.2593E-03 | 0.0000E+00 |             |             |            |            |    |
| 3   | 1 | 1.0044E+01 | 1.0052E+01 | -7.8545E-03 | -7.8201E-02 | 1.0000E+00 | 5.3571E-03 |    |
| 4   | 1 | 8.9286E-03 | 0.0000E+00 |             |             |            |            |    |
| 4   | 1 | 1.0354E+01 | 1.0367E+01 | -1.3257E-02 | -1.2804E-01 | 1.0000E+00 | 6.8966E-03 |    |
| 5   | 1 | 8.6207E-03 | 0.0000E+00 |             |             |            |            |    |
| 5   | 1 | 1.0634E+01 | 1.0635E+01 | -9.0122E-04 | -8.4749E-03 | 1.0000E+00 | 8.3333E-03 |    |
| 6   | 1 | 8.3333E-03 | 0.0000E+00 |             |             |            |            |    |
| 6   | 1 | 1.0864E+01 | 1.0855E+01 | 8.8148E-03  | 8.1138E-02  | 1.0000E+00 | 9.6774E-03 |    |
| 7   | 1 | 8.0645E-03 | 0.0000E+00 |             |             |            |            |    |
| 7   | 1 | 1.1044E+01 | 1.1028E+01 | 1.6241E-02  | 1.4706E-01  | 1.0000E+00 | 1.0937E-02 |    |
| 8   | 1 | 7.8125E-03 | 0.0000E+00 |             |             |            |            |    |
| 8   | 1 | 1.1154E+01 | 1.1152E+01 | 1.9102E-03  | 1.7126E-02  | 1.0000E+00 | 1.2121E-02 |    |
| 9   | 1 | 7.5758E-03 | 0.0000E+00 |             |             |            |            |    |
| 9   | 1 | 1.1224E+01 | 1.1230E+01 | -5.8193E-03 | -5.1847E-02 | 1.0000E+00 | 1.3235E-02 |    |
| 10  | 1 | 7.3529E-03 | 0.0000E+00 |             |             |            |            |    |
| 10  | 1 | 1.1254E+01 | 1.1262E+01 | -7.9689E-03 | -7.0810E-02 | 1.0000E+00 | 1.4286E-02 |    |
| 11  | 1 | 7.1429E-03 | 0.0000E+00 |             |             |            |            |    |
| 11  | 1 | 1.1274E+01 | 1.1271E+01 | 2.6150E-03  | 2.3195E-02  | 1.0000E+00 | 1.6216E-02 |    |
| 12  | 1 | 6.7568E-03 | 0.0000E+00 |             |             |            |            |    |

TOLERANCE ON SUM OF SQUARES 0.0100  
 TOLERANCE ON EIGEN VALUES 0.0001  
 CONVERGANCE AFTER 39 ITERATIONS

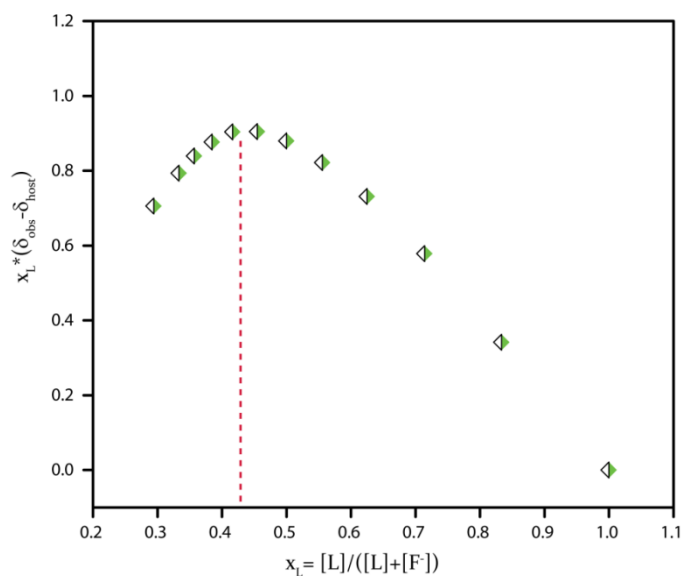

**Figure S50.** Job plot using urea-NH resonances for  $L_2$  and fluoride anion, showing a maximum at 0.43 mole fraction value of the receptor for the multiple equilibria existing between 1: 1 and 1 : 2 complexes.

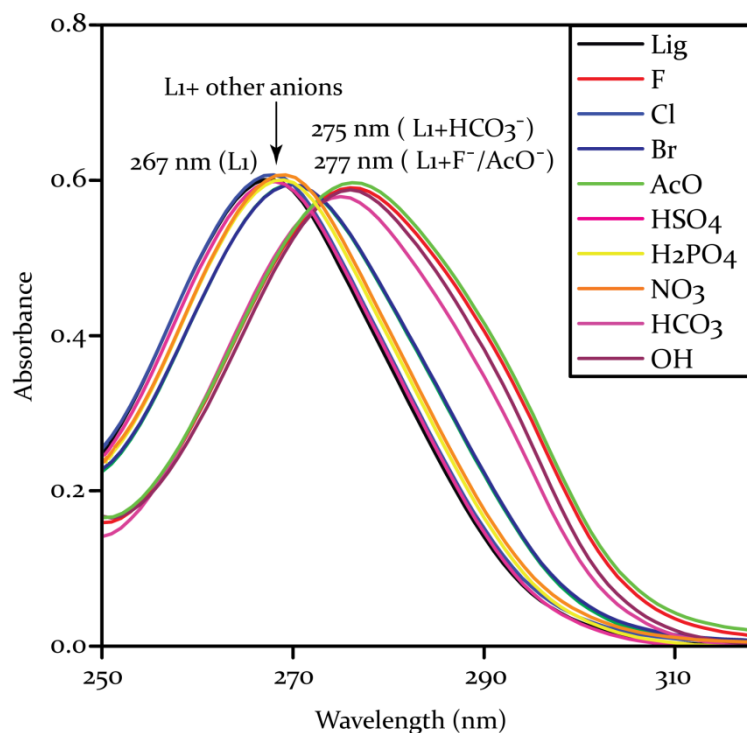

**Figure S51.** Changes in the UV/Vis spectrum of  $L_1$  in MeCN upon addition of *n*-TBA salts of anions (20 equiv.)

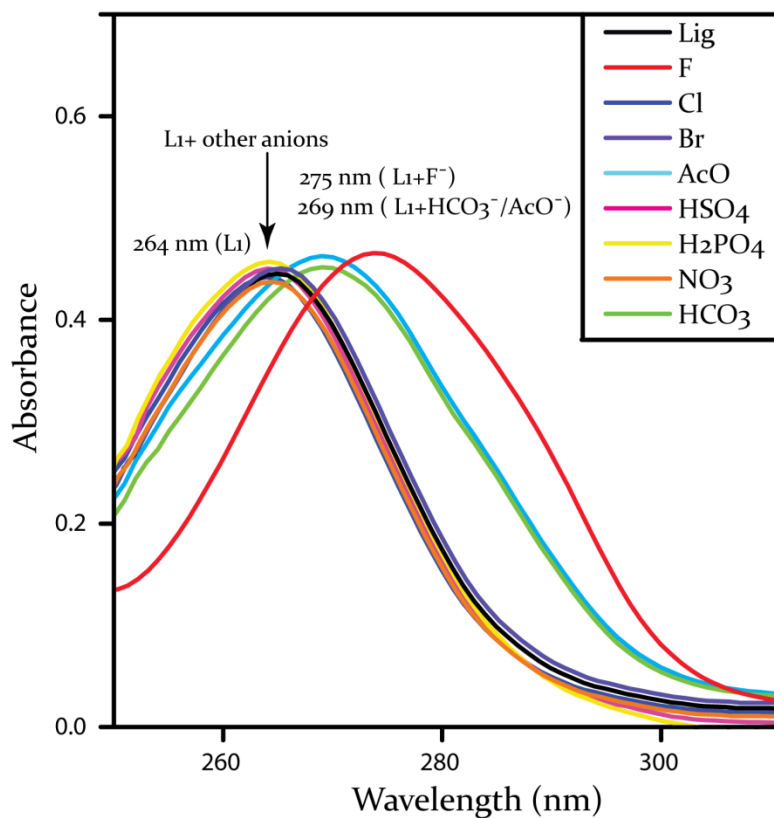

**Figure S52.** Changes in the UV/Vis spectrum of  $L_2$  in MeCN upon addition of *n*-TBA salts of anions (20 equiv.)

## References

1. Hynes, M.J., EQNMR: A computer program for the calculation of stability constants from nuclear magnetic resonance chemical shift data, *J. Chem. Soc., Dalton Trans.* **1993** 311-312.
